# Supplementary material for: Salicylic Acid as Ionic Liquid Formulation May Have Enhanced Potency to Treat Some Chronic Skin Diseases
Source: MDPI journal article supplement (doi:10.3390/molecules27010216), 2021-12-30
Supplement: s1 [file s1]

Supplementary Material

# Salicylic Acid as Ionic Liquid Formulation May Have Enhanced Potency to Treat Some Chronic Skin Diseases

Joanna Klebeko <sup>1</sup>, Paula Ossowicz-Rupniewska <sup>1</sup>, Ewelina Świątek <sup>1</sup>, Joanna Szachnowska <sup>1</sup>, Ewa Janus <sup>1</sup>, Stefka G. Taneva <sup>2</sup>, Elena Krachmarova <sup>3</sup> and Maya Guncheva <sup>4,\*</sup>

<sup>1</sup> Department of Chemical Organic Technology and Polymeric Materials, Faculty of Chemical Technology and Engineering, West Pomeranian University of Technology in Szczecin, Piastów Ave. 42, 71-065 Szczecin, Poland; joanna.klebeko@gmail.com (J.K.); possowicz@zut.edu.pl (P.O.-R.); ewelinaswiatek94@gmail.com (E.Ś.); j.szachnowska@gmail.com (J.S.); ejanus@zut.edu.pl (E.J.)

<sup>2</sup> Institute of Biophysics and Biomedical Engineering, Bulgarian Academy of Sciences, Acad. G. Bonchev Str. 21, 1113 Sofia, Bulgaria; sgtaneva@gmail.com

<sup>3</sup> Institute of Molecular Biology “Roumen Tsanev”, Bulgarian Academy of Sciences, Acad. G. Bonchev Str, Block 21, 1113 Sofia, Bulgaria; elenakrachmarova@bio21.bas.bg

<sup>4</sup> Institute of Organic Chemistry with Centre of Phytochemistry, Bulgarian Academy of Sciences, Acad. G. Bonchev Bl. 9, 1113 Sofia, Bulgaria

\* Correspondence: maya.guncheva@orgchm.bas.bg

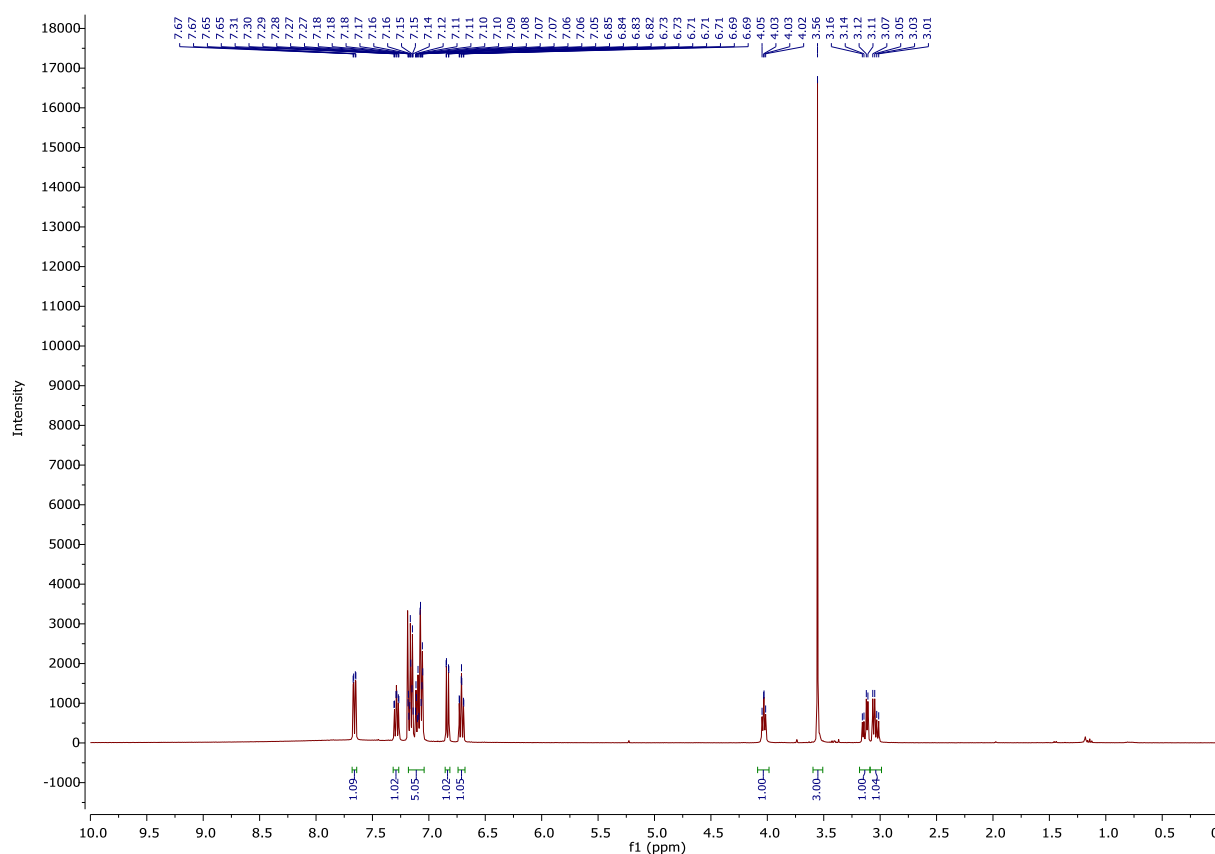

Figure S1. <sup>1</sup>H NMR spectra of [PheOMe][SA].

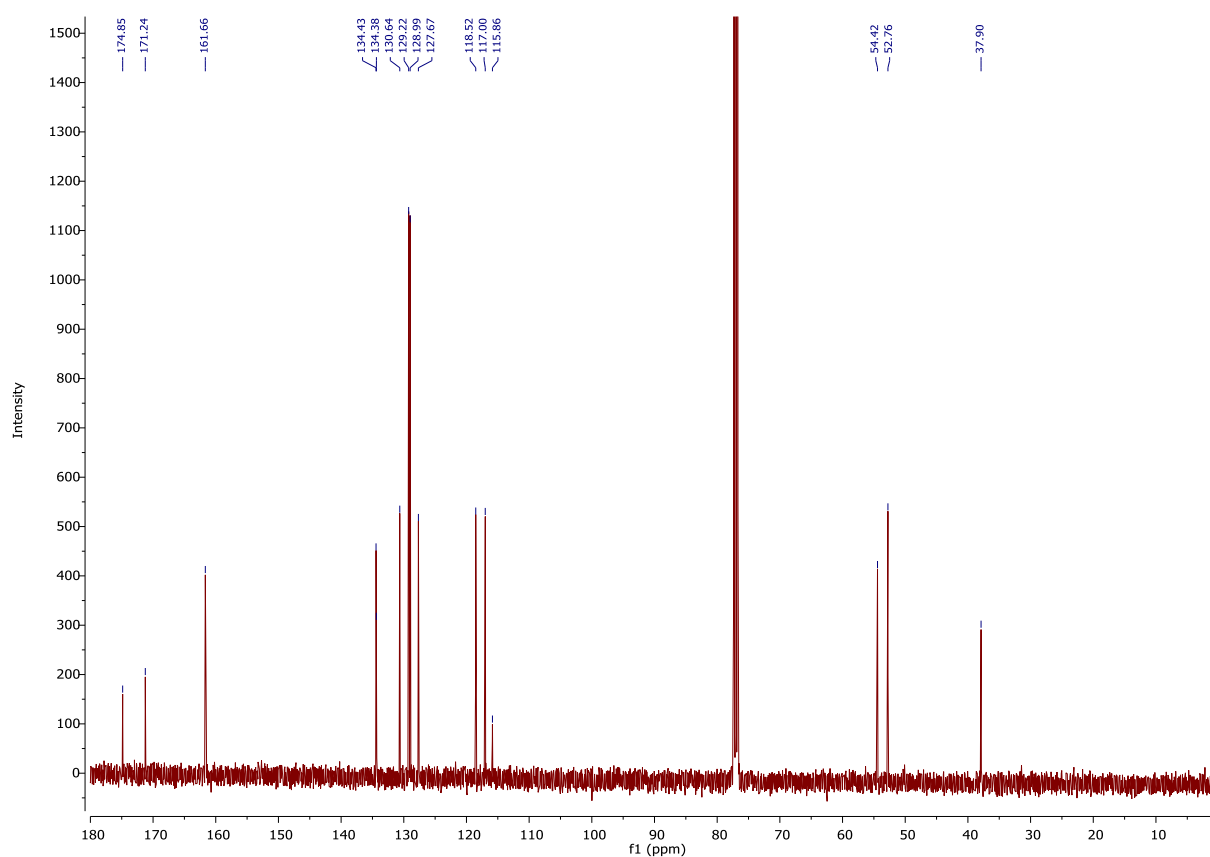Figure S2.  $^{13}\text{C}$  NMR spectra of [PheOMe][SA].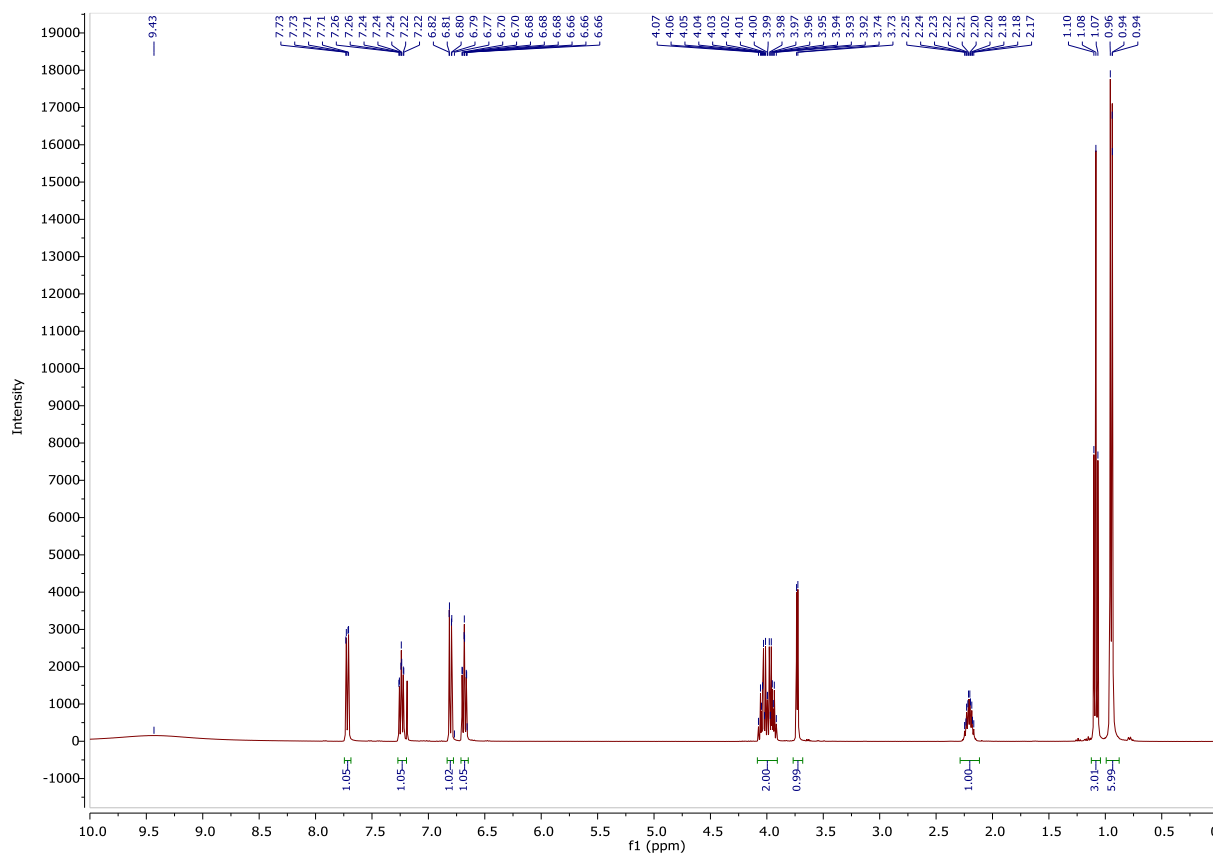Figure S3.  $^1\text{H}$  NMR spectra of [ValOEt][SA].

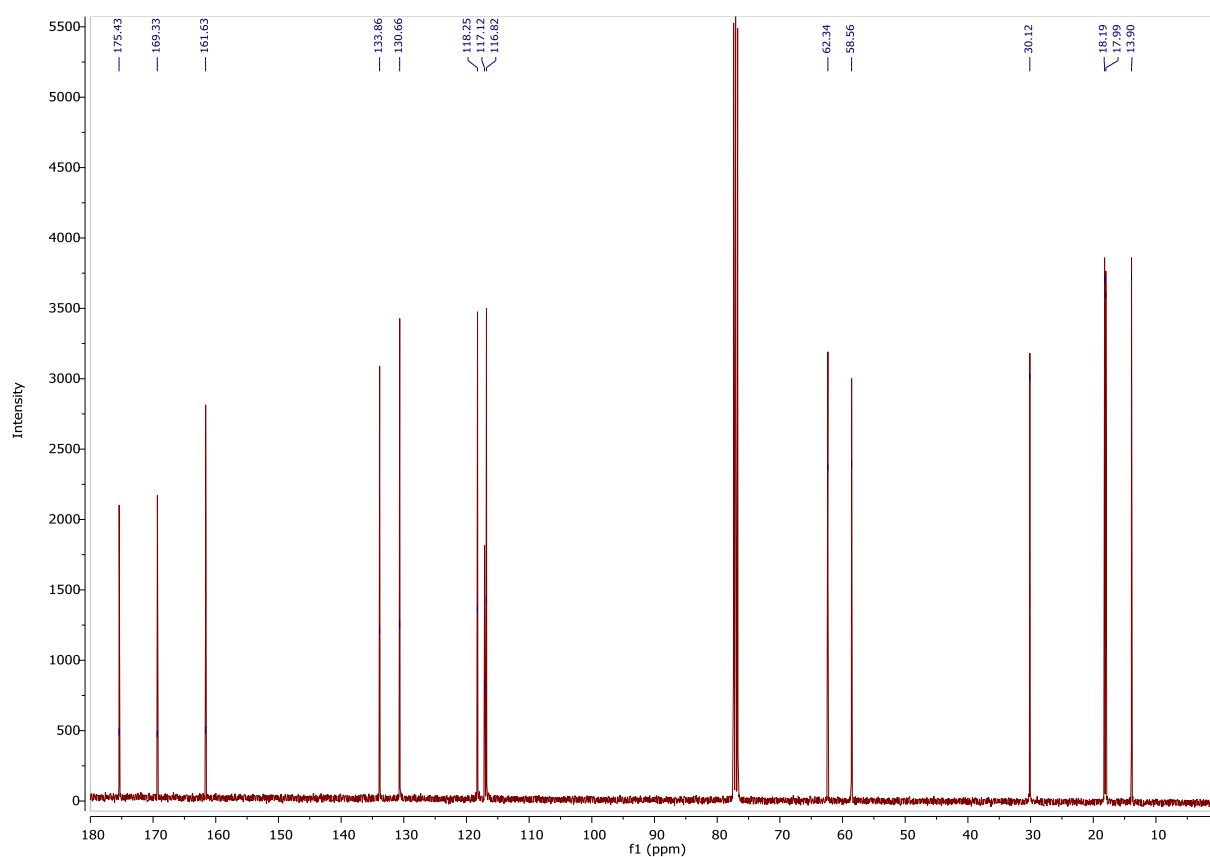Figure S4.  $^{13}\text{C}$  NMR spectra of [ValOEt][SA].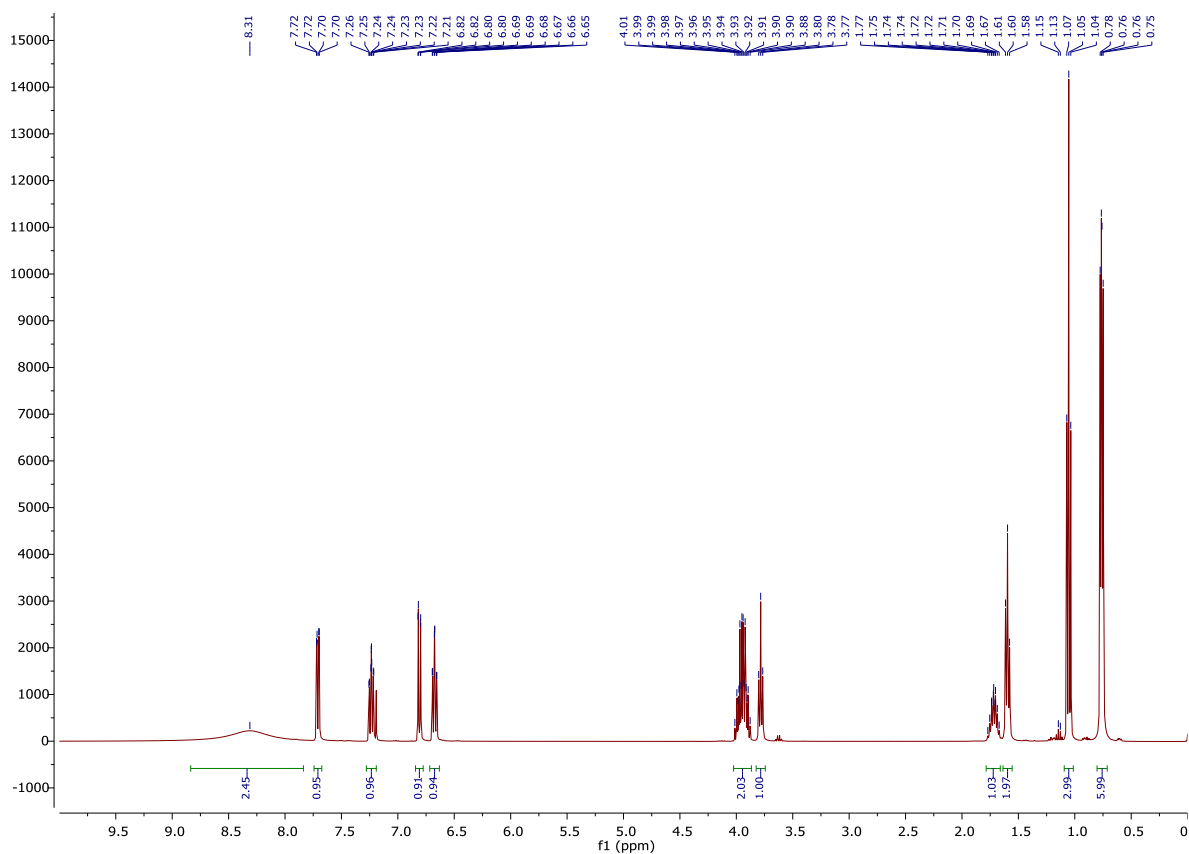Figure S5.  $^1\text{H}$  NMR spectra of [LeuOEt][SA].

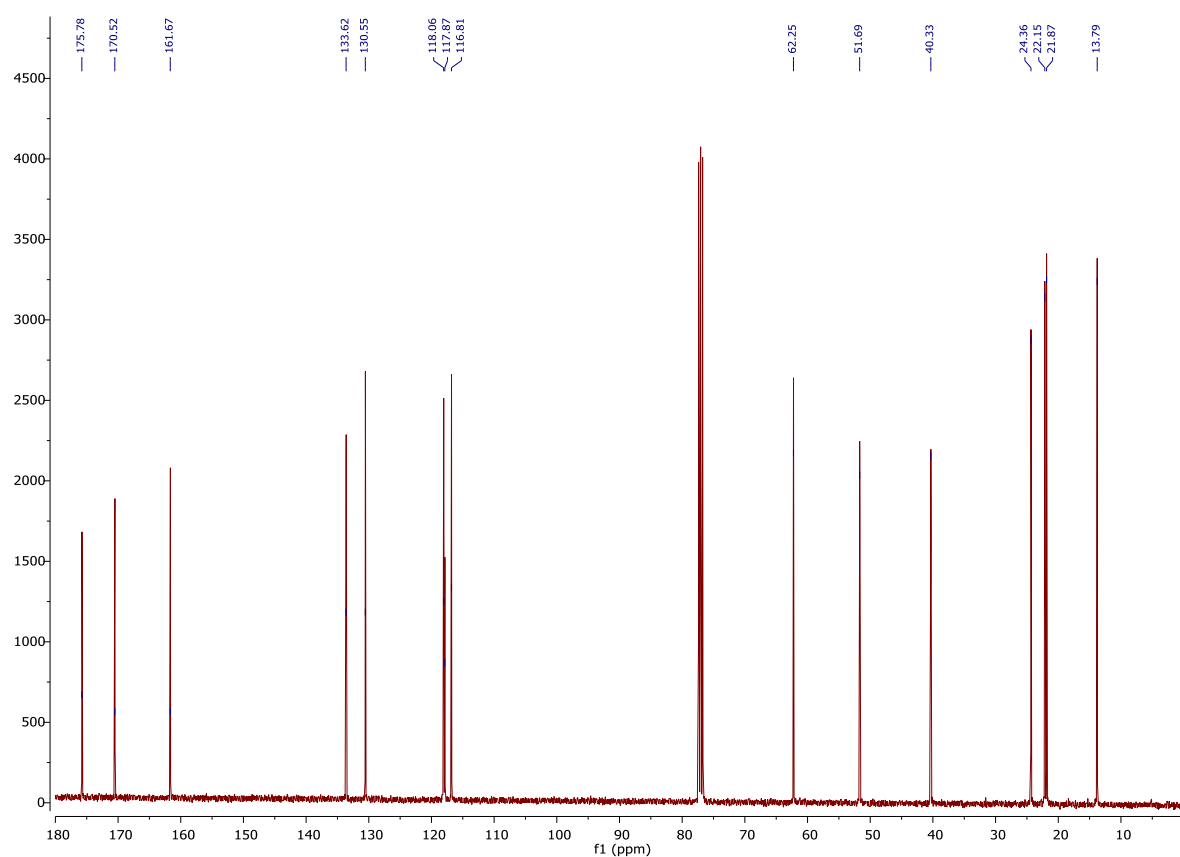Figure S6. <sup>13</sup>C NMR spectra of [LeuOEt][SA].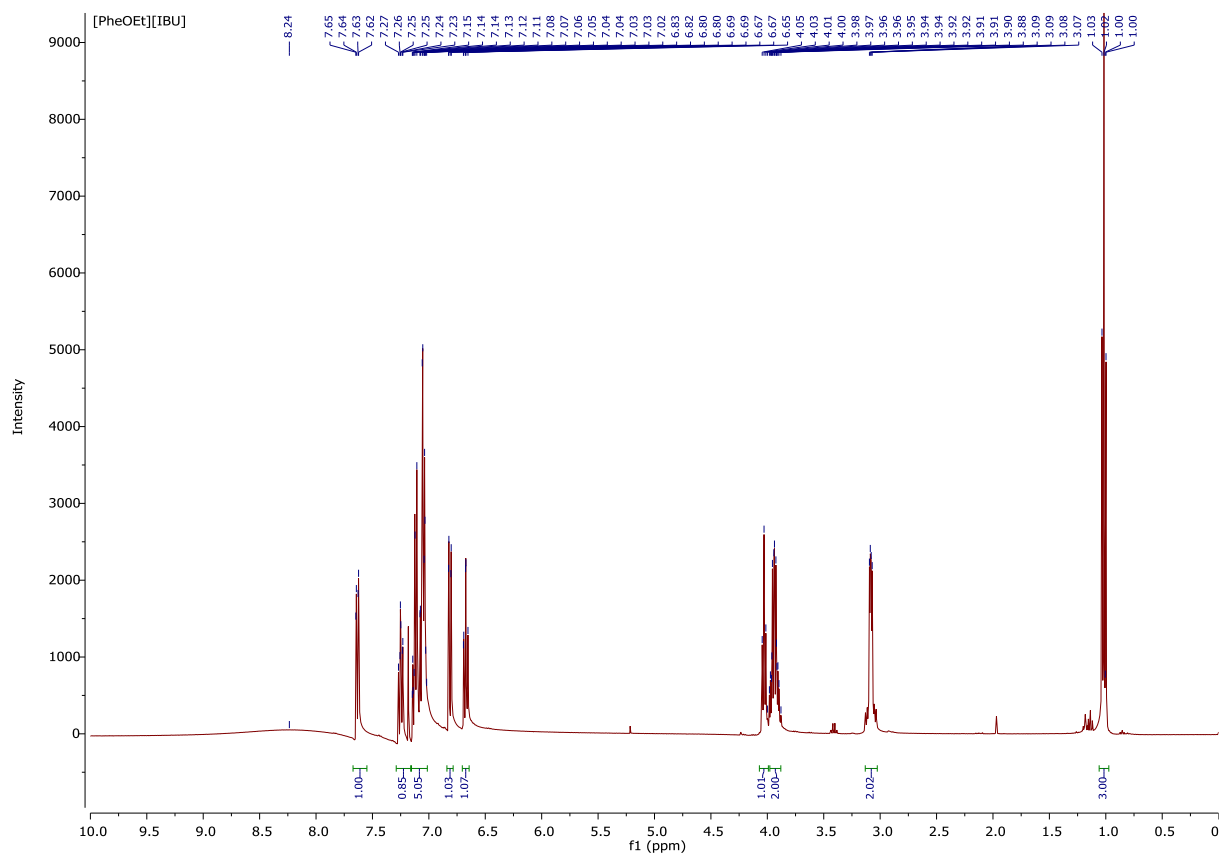Figure S7. <sup>1</sup>H NMR spectra of [PheOEt][SA].

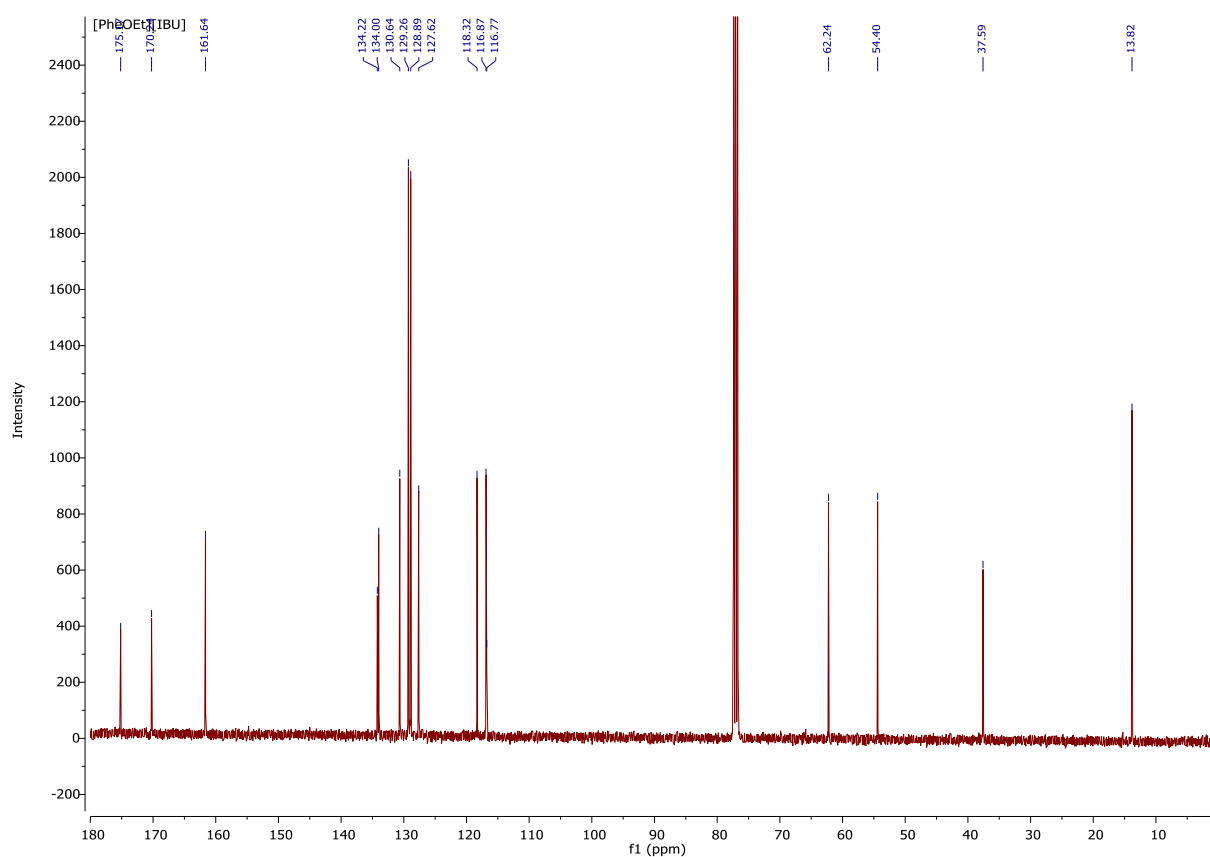Figure S8. <sup>13</sup>C NMR spectra of [PheOEt][SA].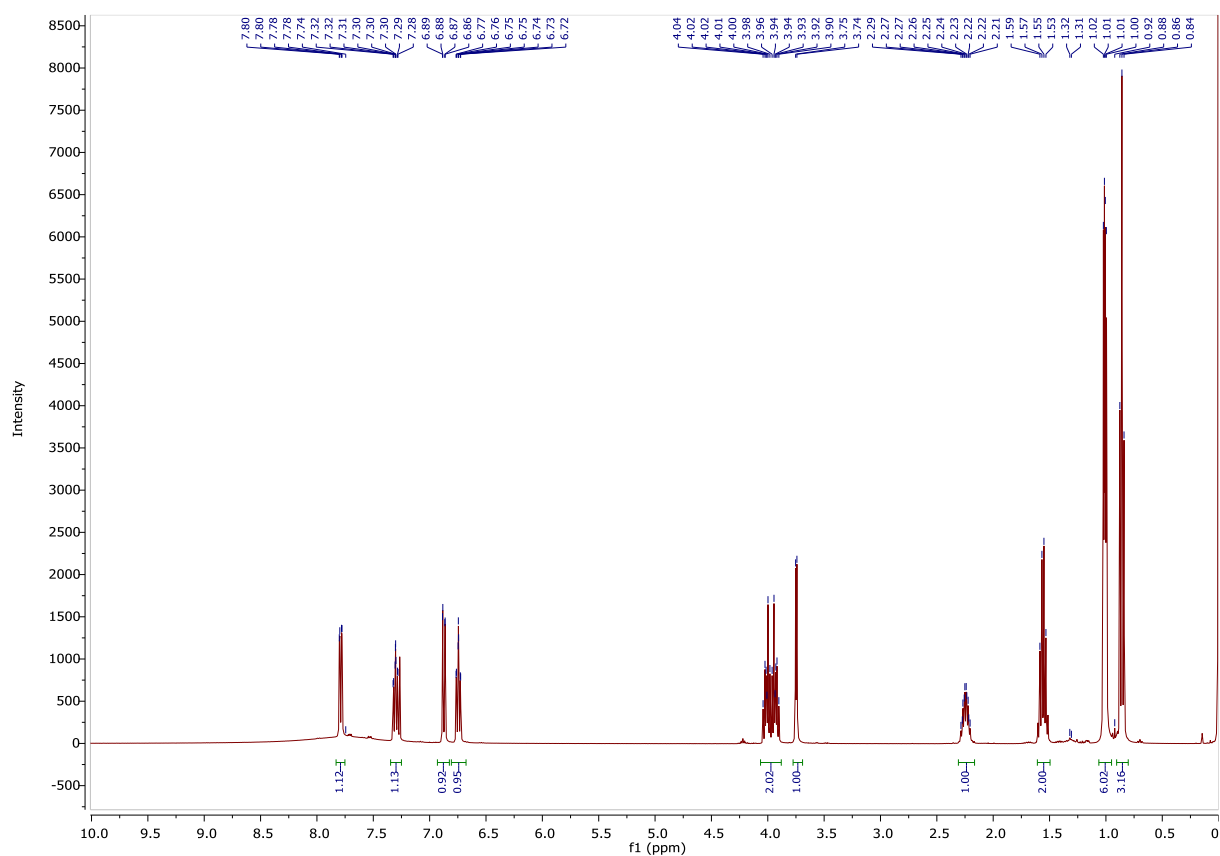Figure S9. <sup>1</sup>H NMR spectra of [ValOPr][SA].

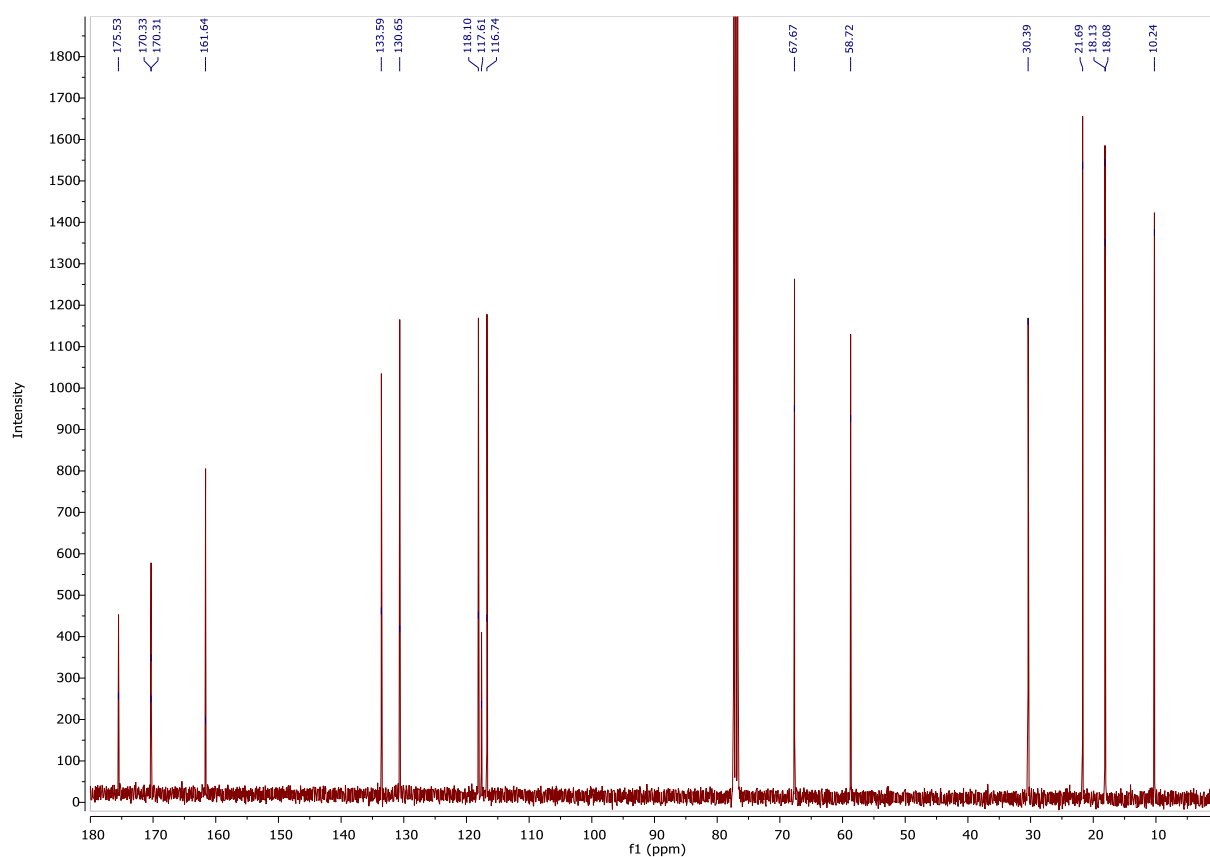Figure S10. <sup>13</sup>C NMR spectra of [ValOPr][SA].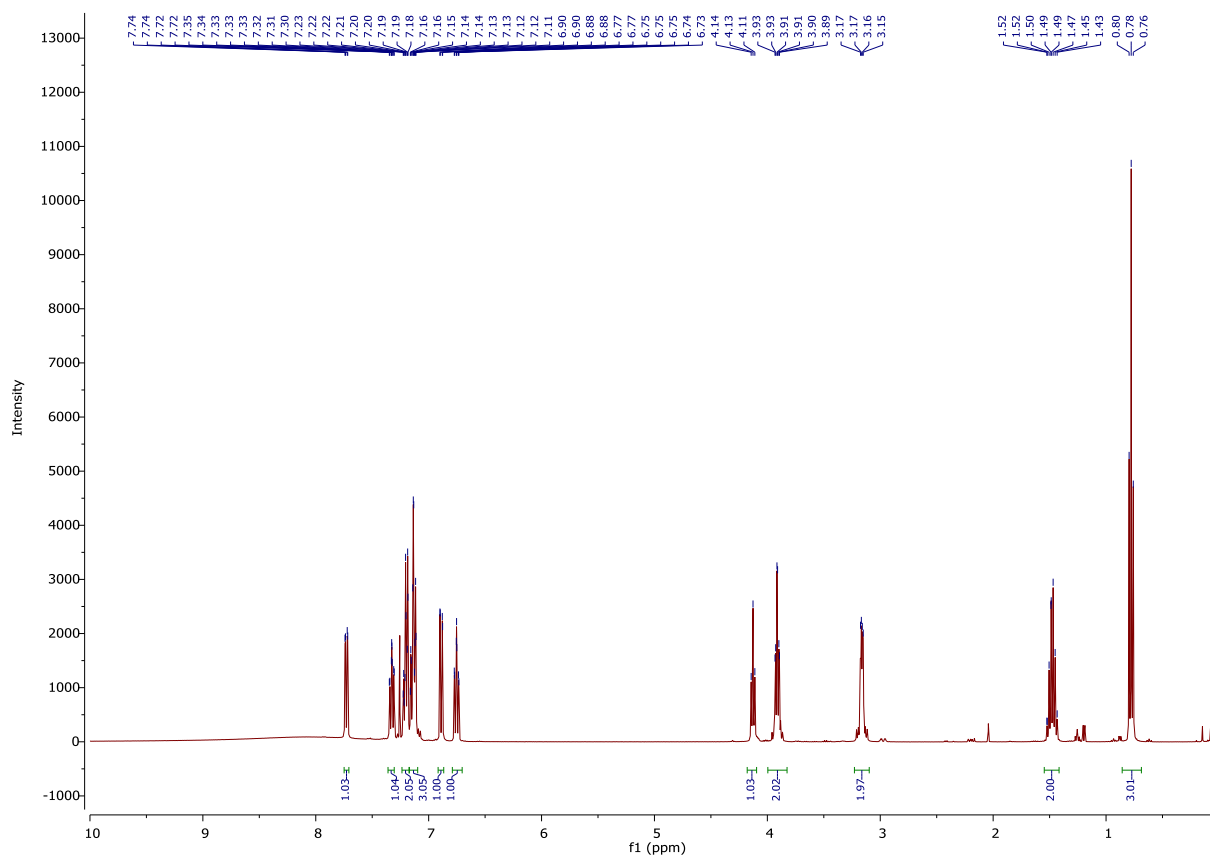Figure S11. <sup>1</sup>H NMR spectra of [PheOPr][SA].

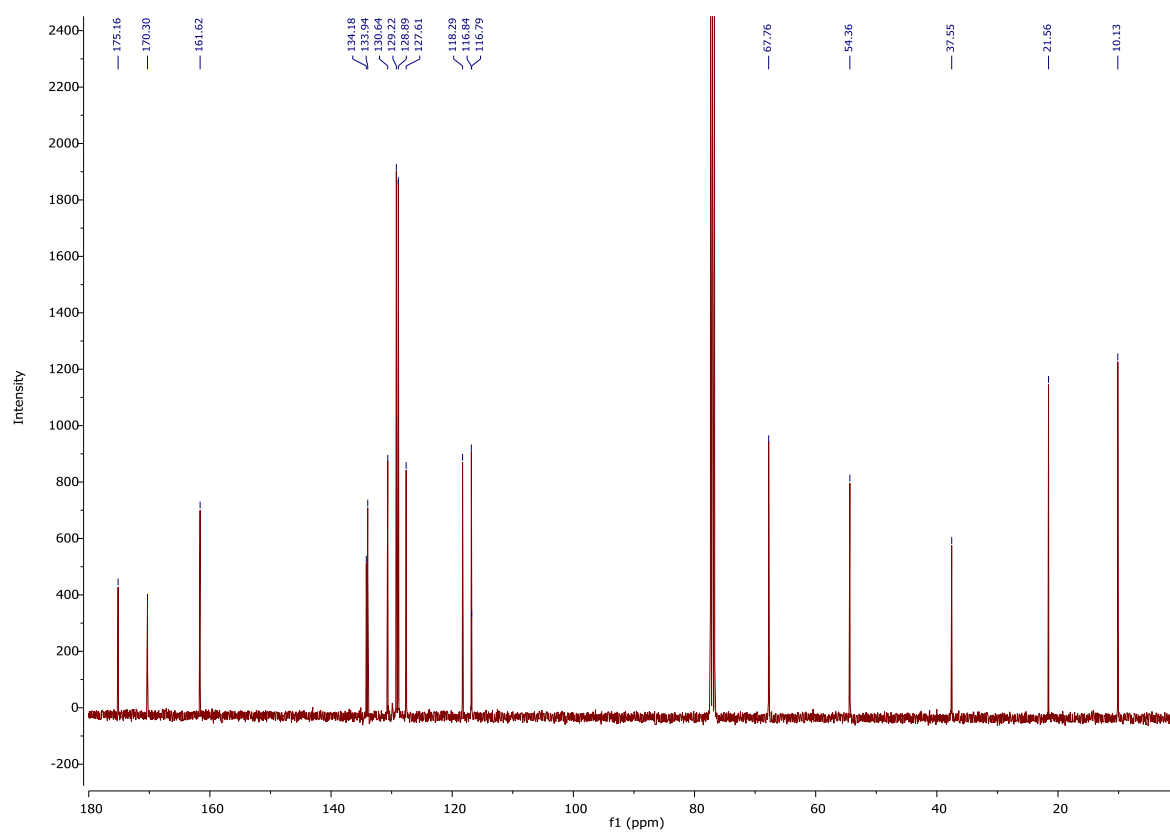Figure S12. <sup>13</sup>C NMR spectra of [PheOPr][SA].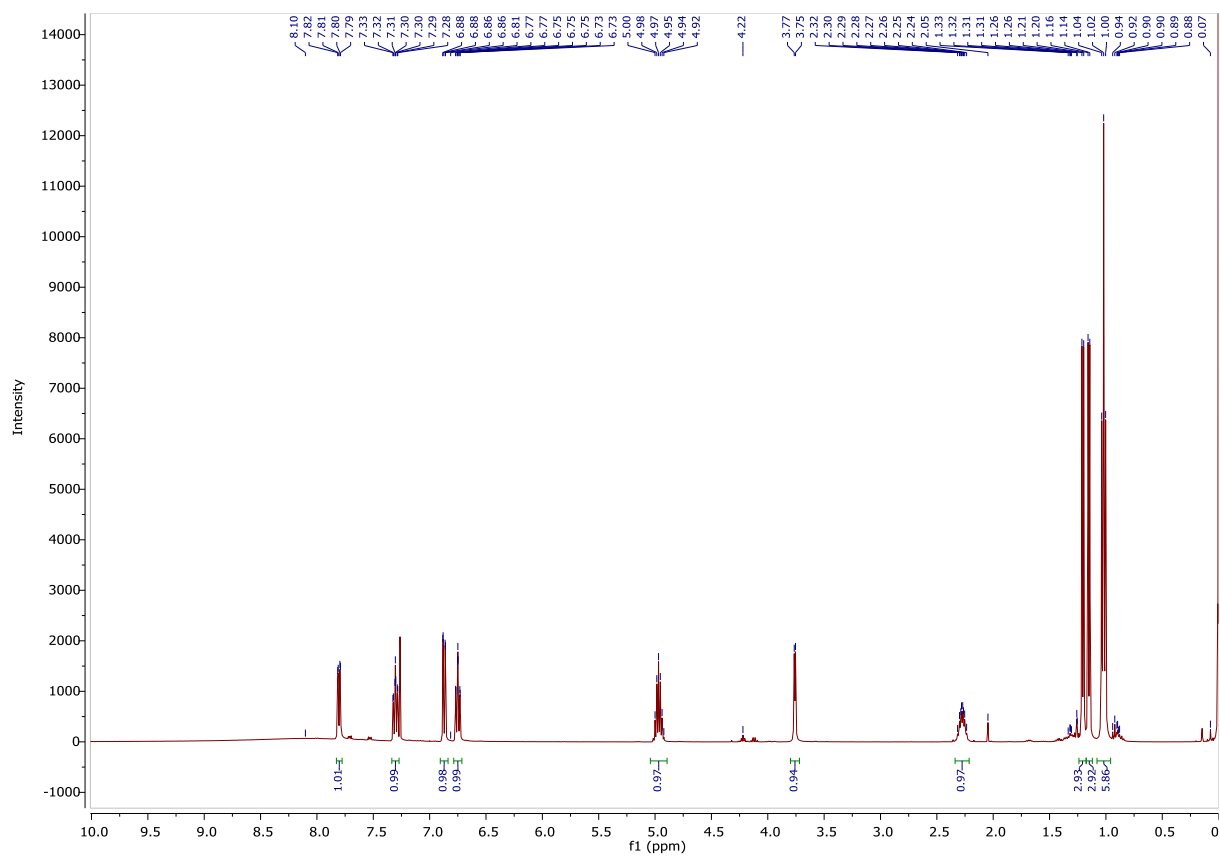Figure S13. <sup>1</sup>H NMR spectra of [ValOiPr][SA].

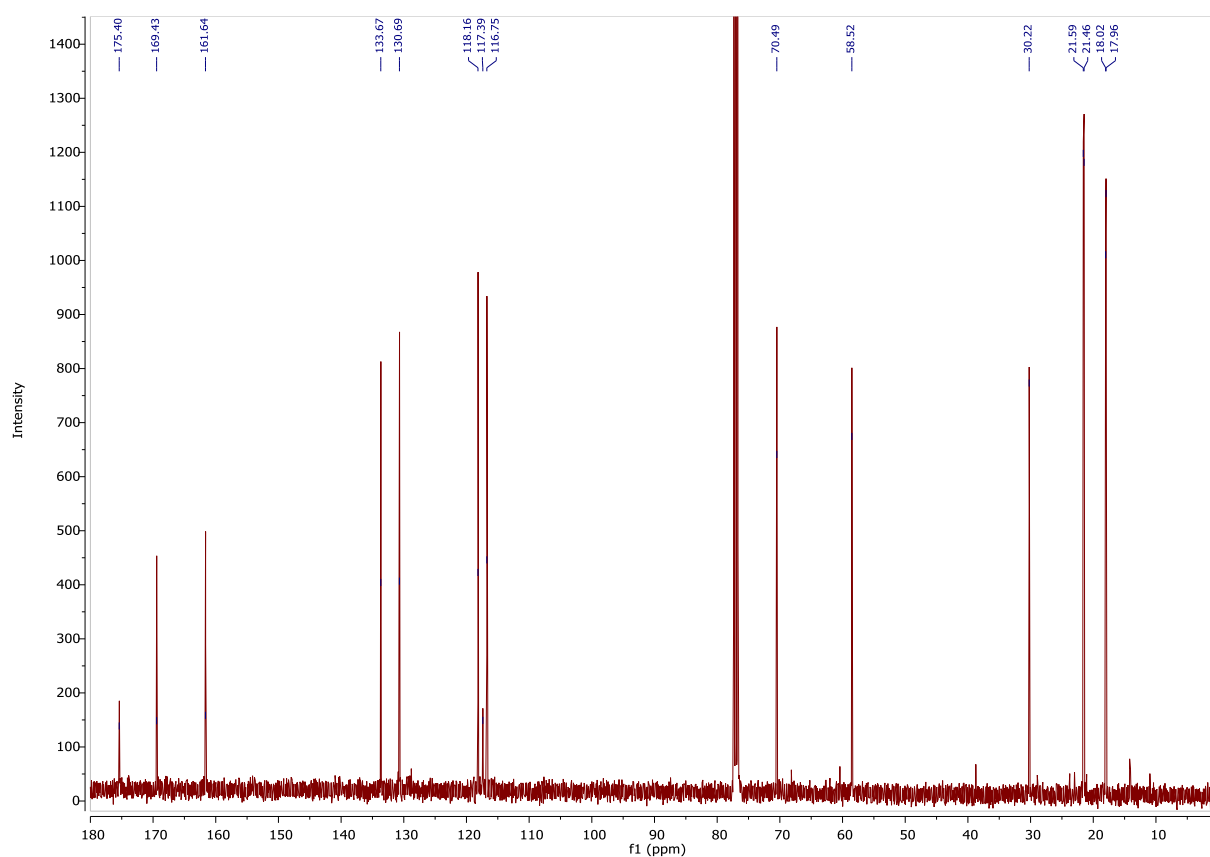Figure S14.  $^{13}\text{C}$  NMR spectra of [ValOiPr][SA].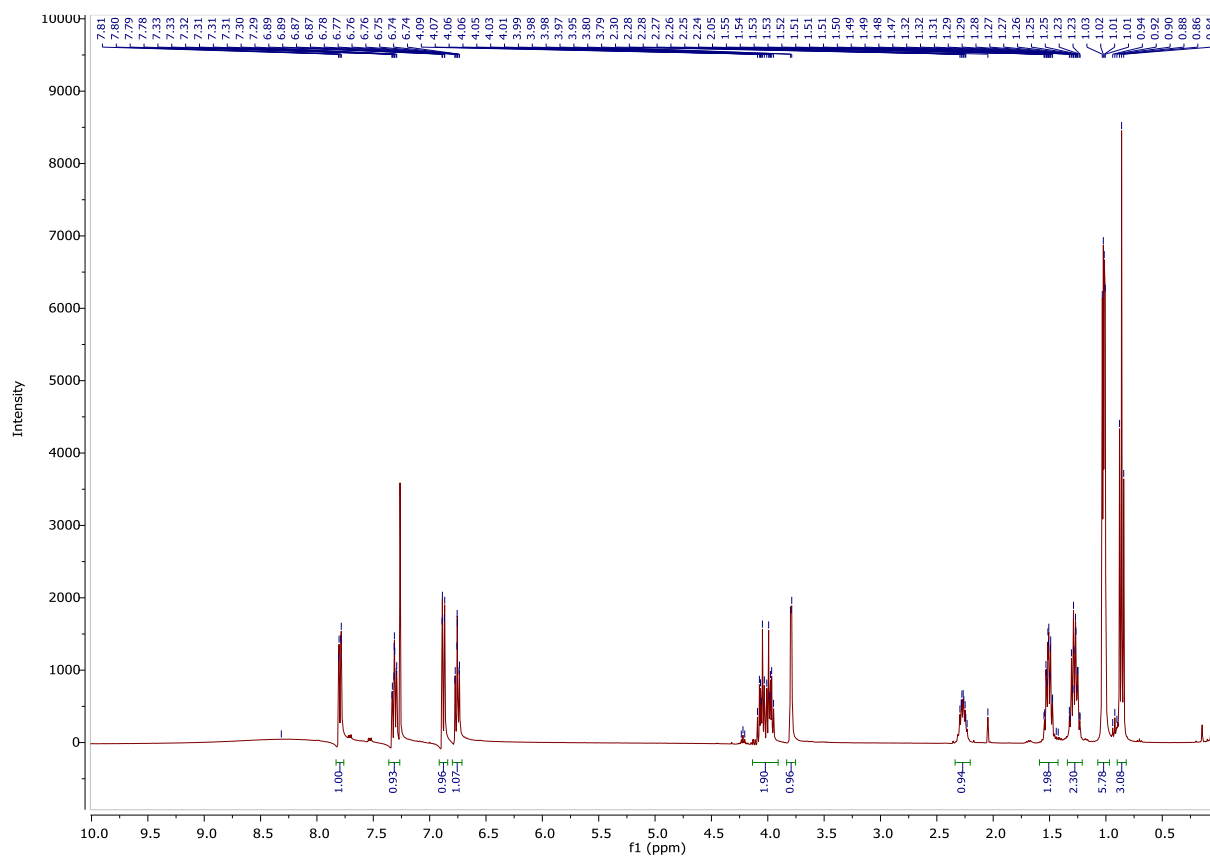Figure S15.  $^1\text{H}$  NMR spectra of [ValOBu][SA].



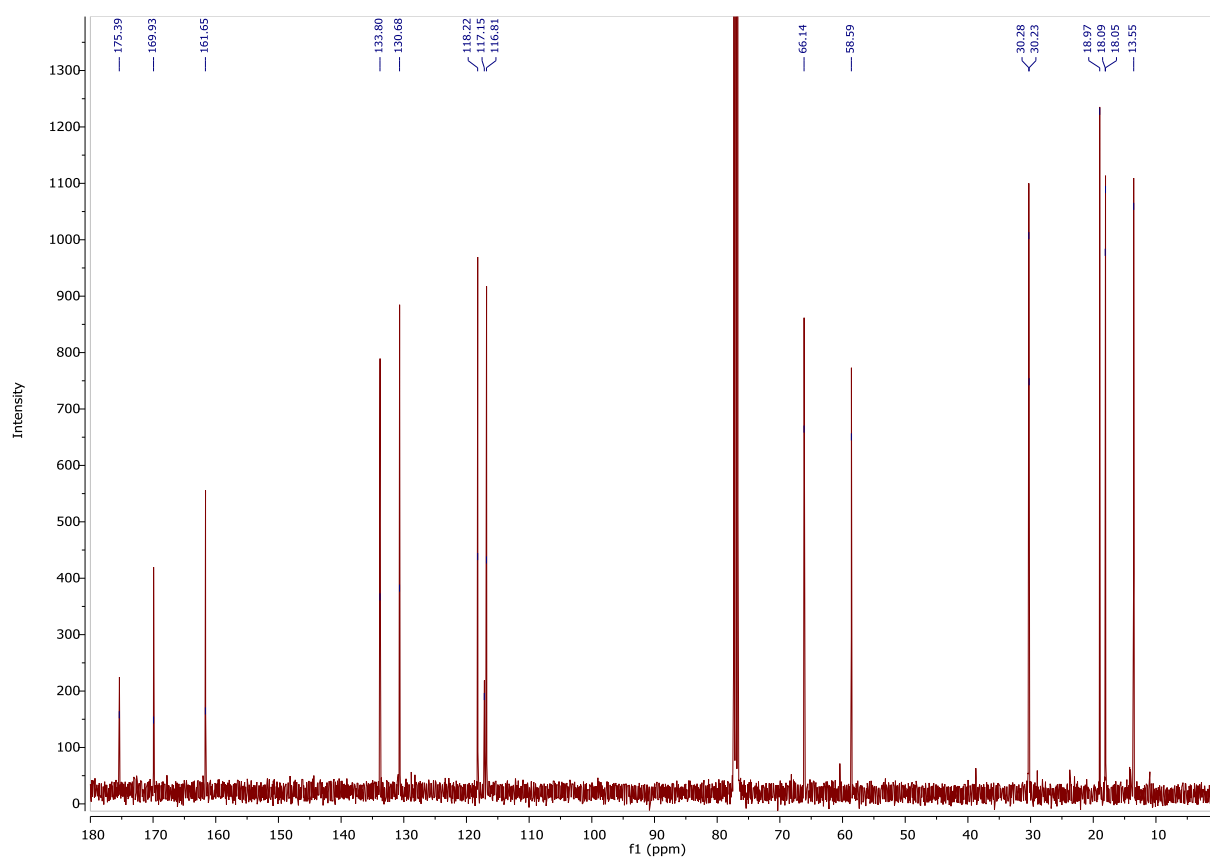Figure S16.  $^{13}\text{C}$  NMR spectra of [ValOBu][SA].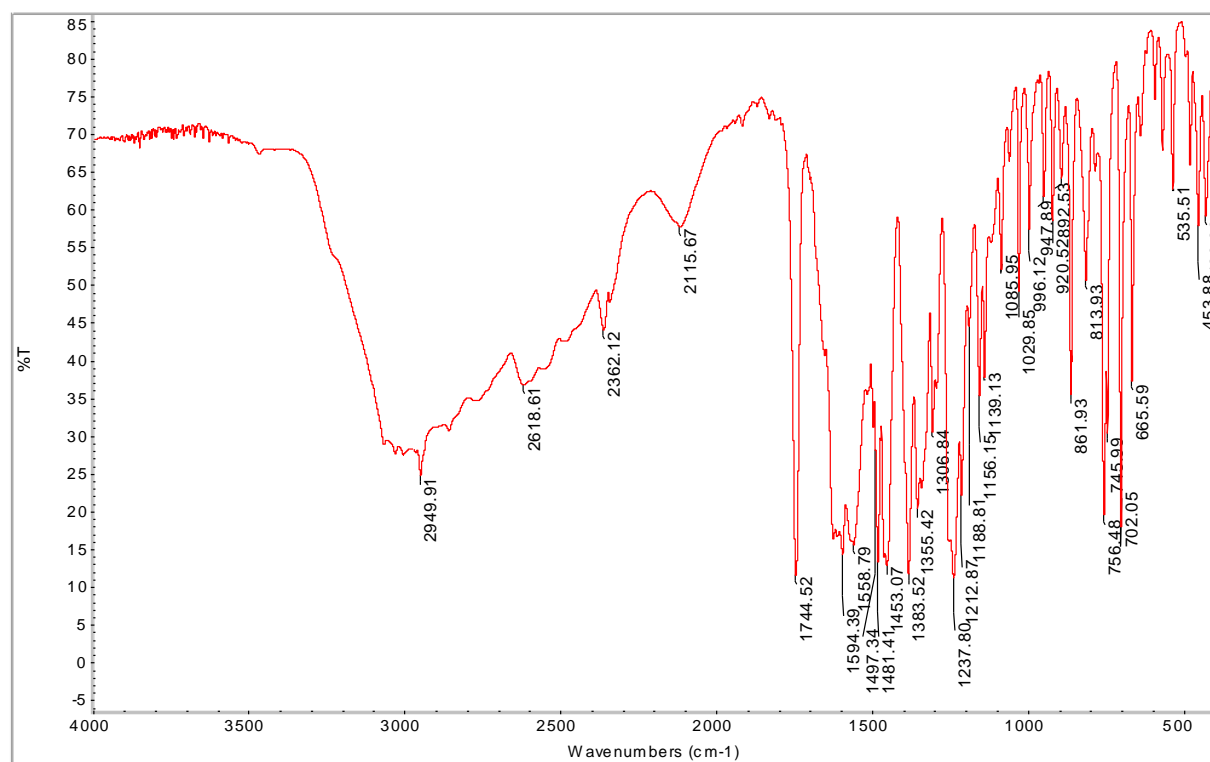

Figure S17. FT-IR spectra of [PheOMe][SA].

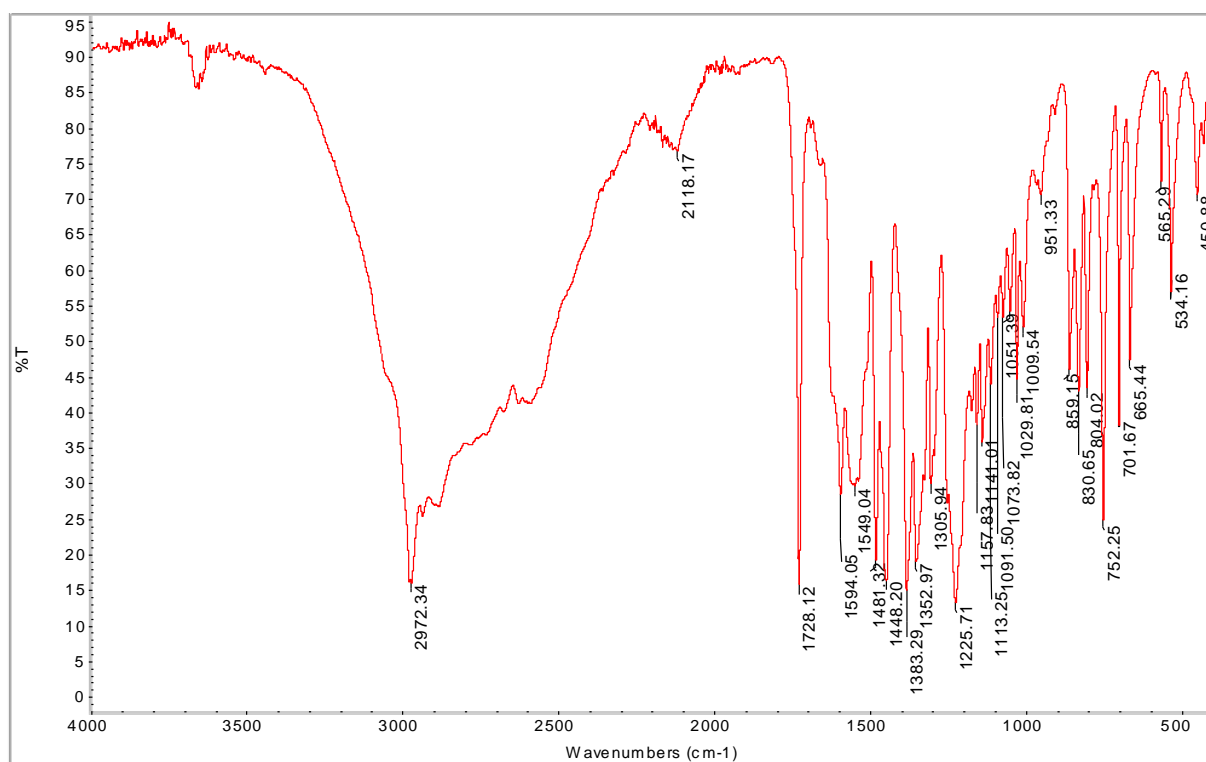

Figure S18. FT-IR spectra of [ValOEt][SA].

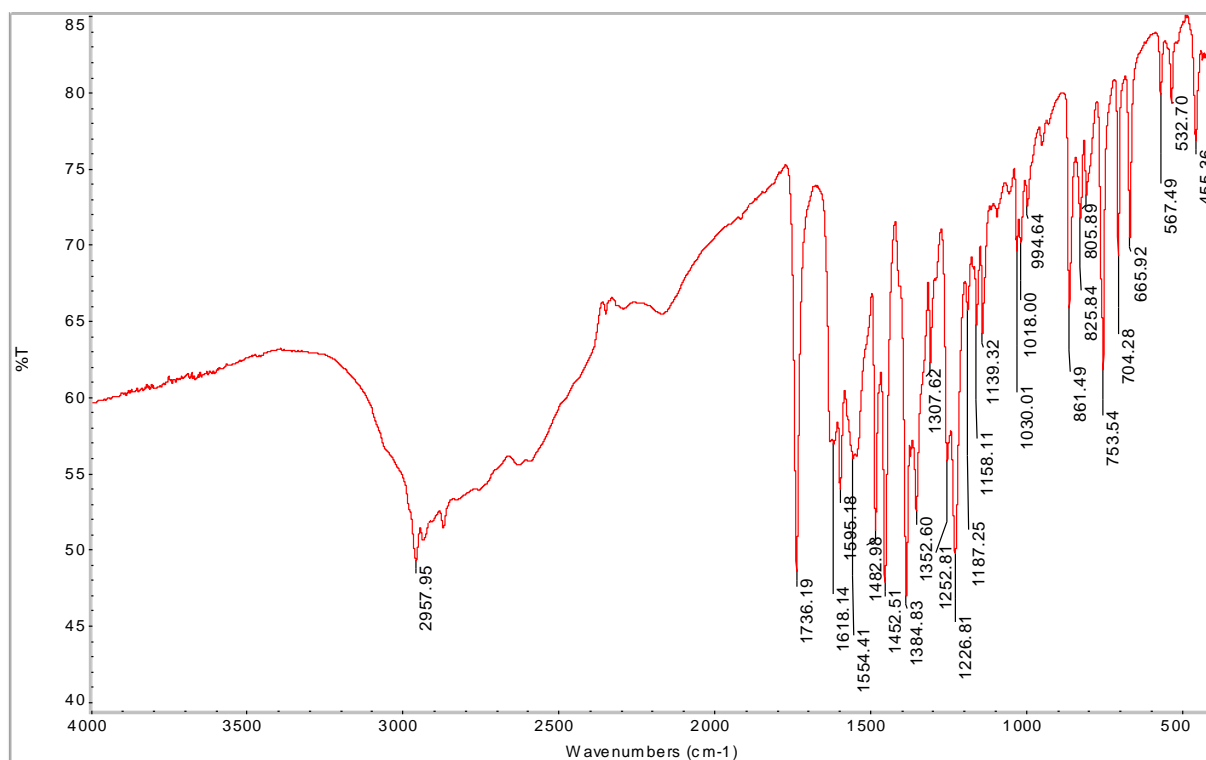

Figure S19. FT-IR spectra of [LeuOEt][SA].

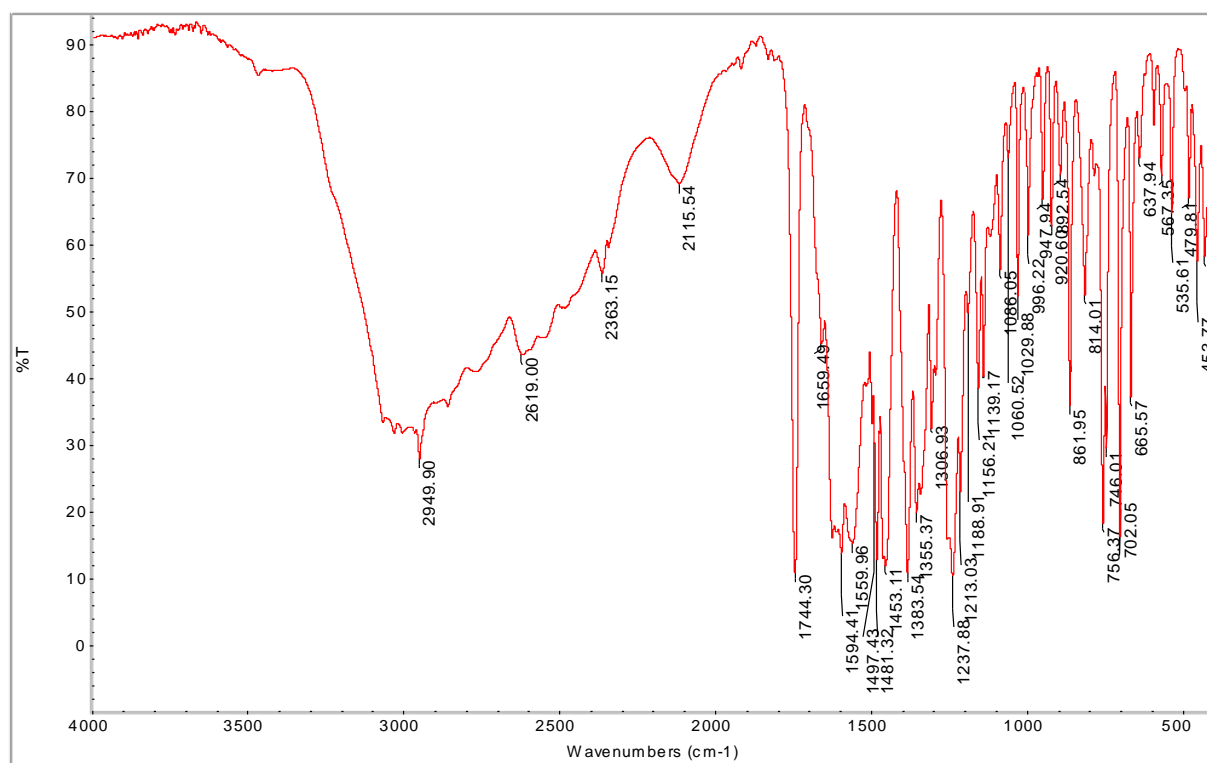

Figure S20. FT-IR spectra of [PheOEt][SA].

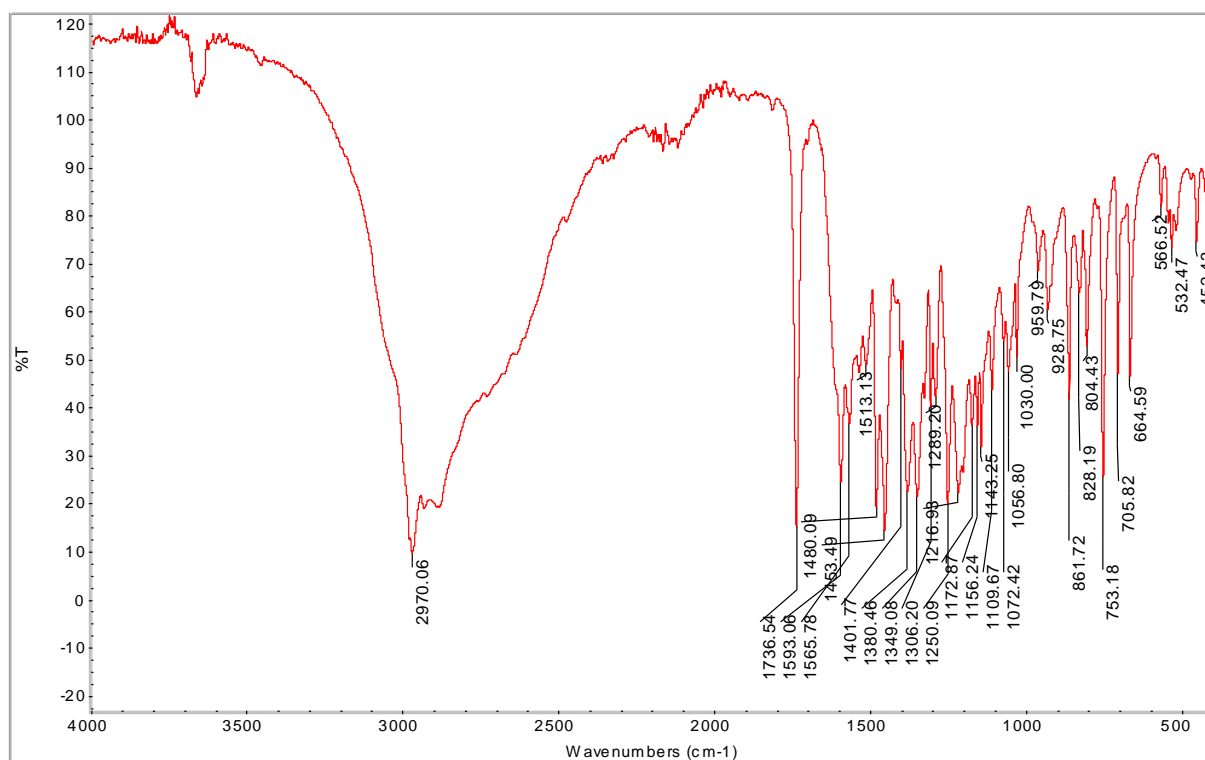

Figure S21. FT-IR spectra of [ValOPr][SA].

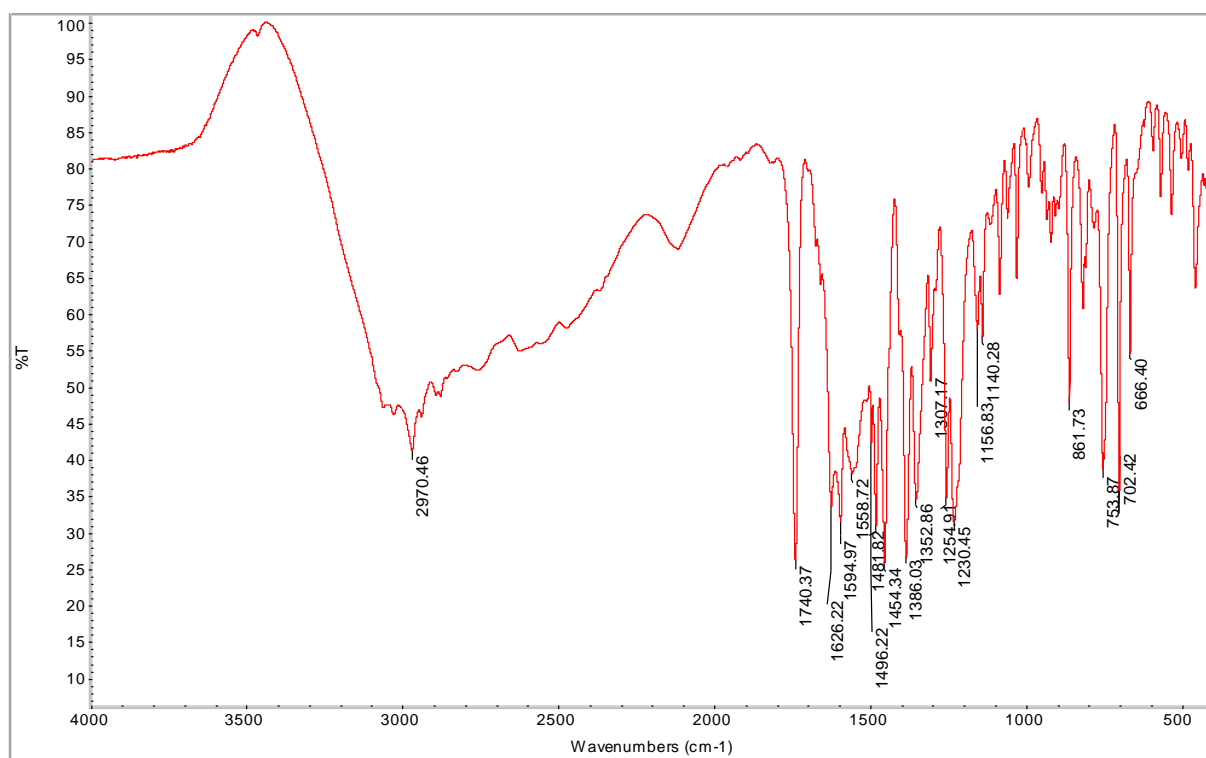

Figure S22. FT-IR spectra of [PheOPr][SA].

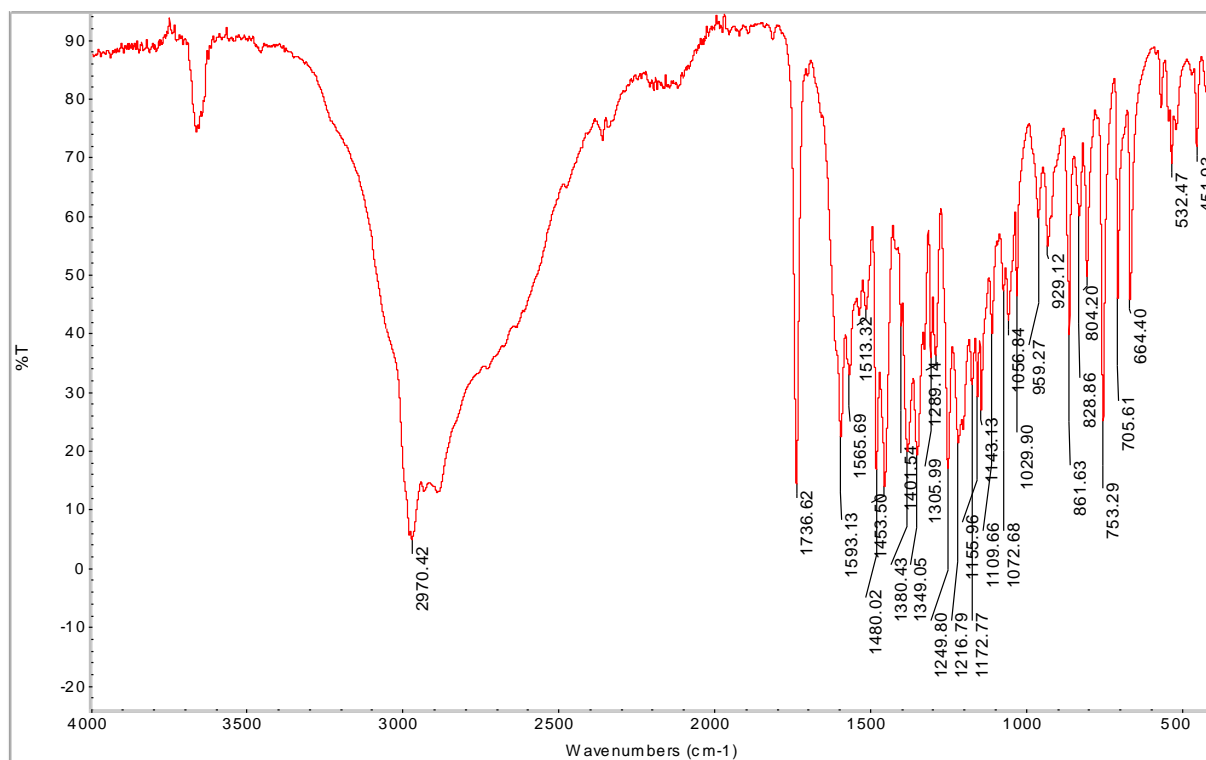

Figure S23. FT-IR spectra of [ValOiPr][SA].

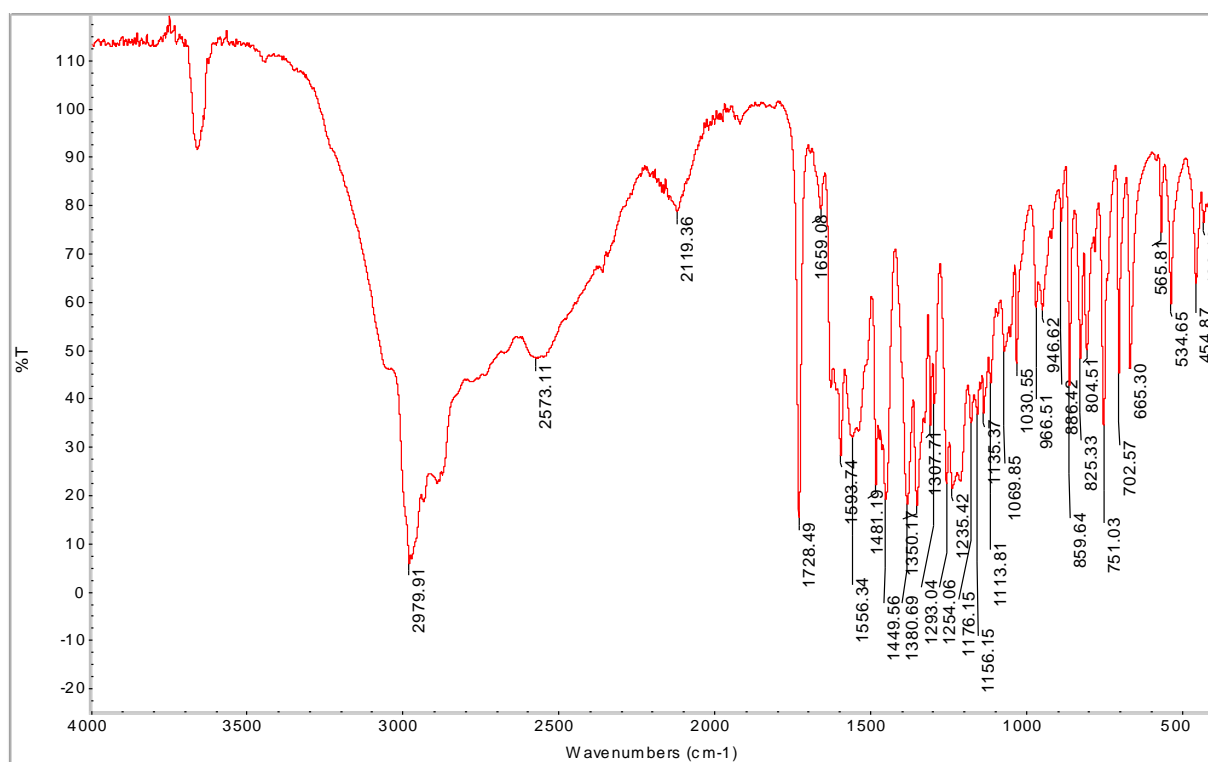

Figure S24. FT-IR spectra of [ValOBu][SA].

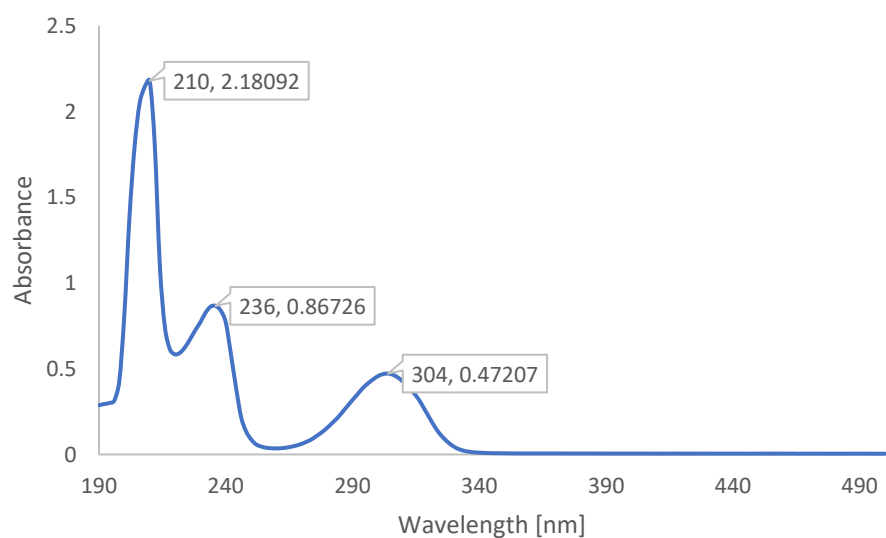

Figure S25. UV-Vis spectra of [PheOMe][SA].

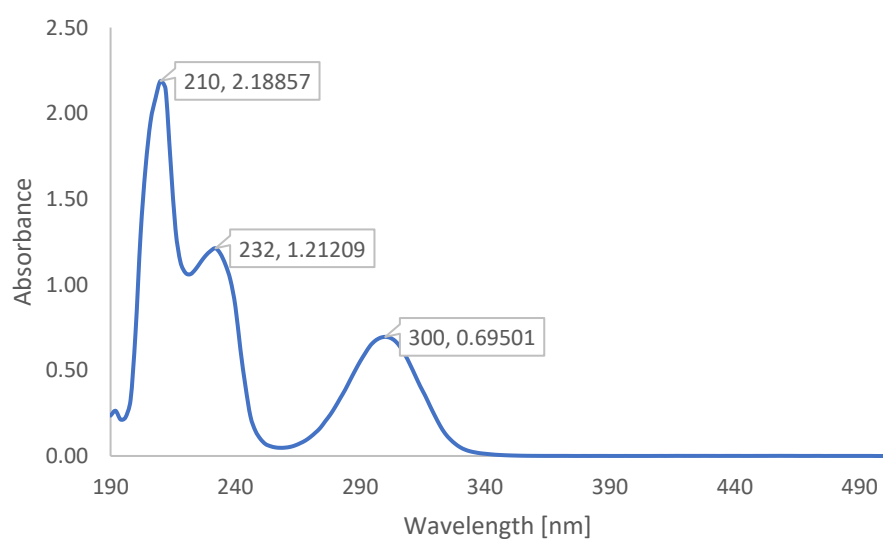

**Figure S26.** UV-Vis spectra of [ValOEt][SA].

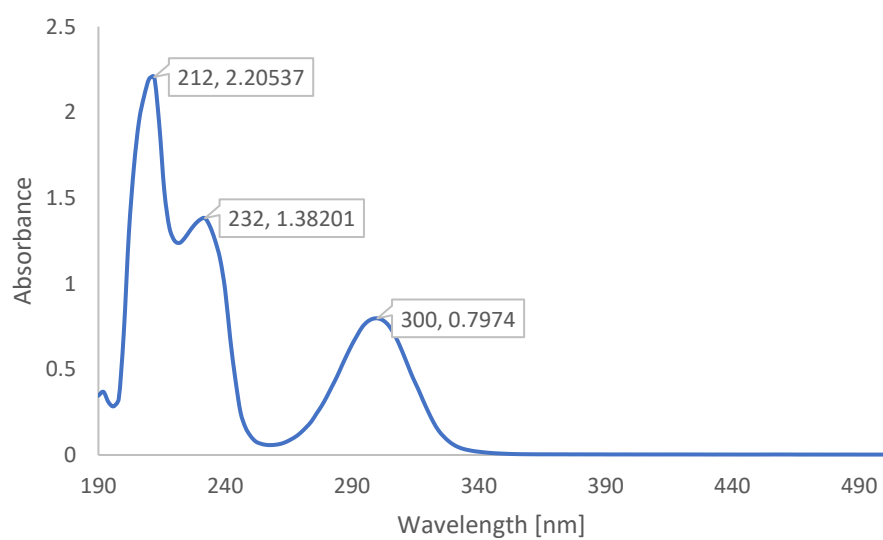

**Figure S27.** UV-Vis spectra of [LeuOEt][SA].

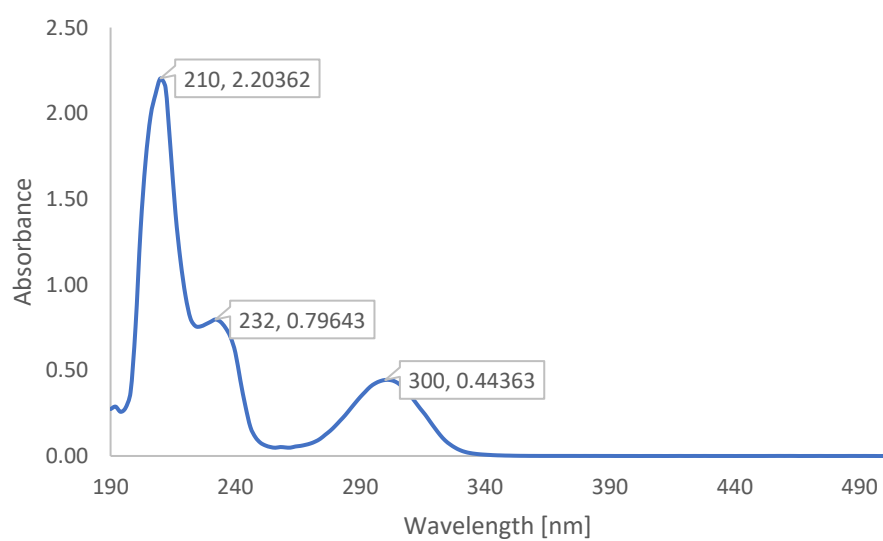

**Figure S28.** UV-Vis spectra of [PheOEt][SA].

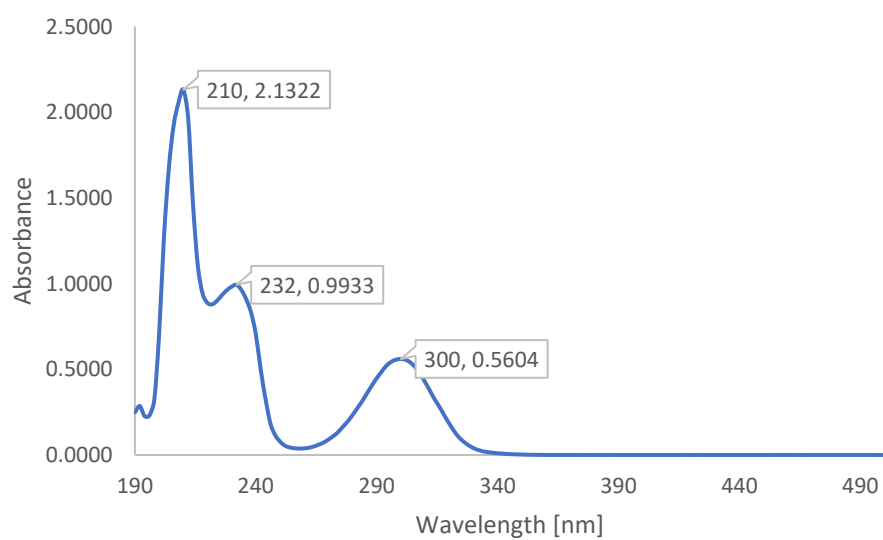

**Figure S29.** UV-Vis spectra of [ValOPr][SA].

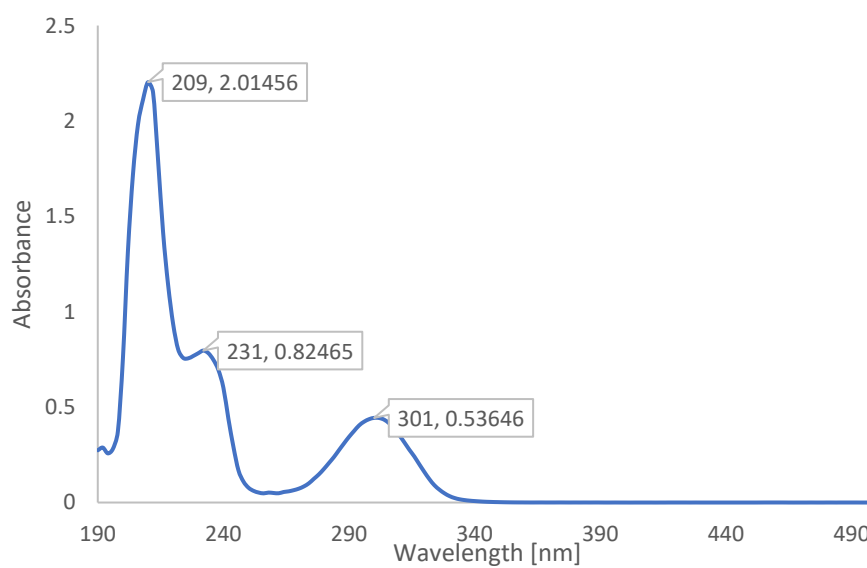

**Figure S30.** UV-Vis spectra of [PheOPr][SA].

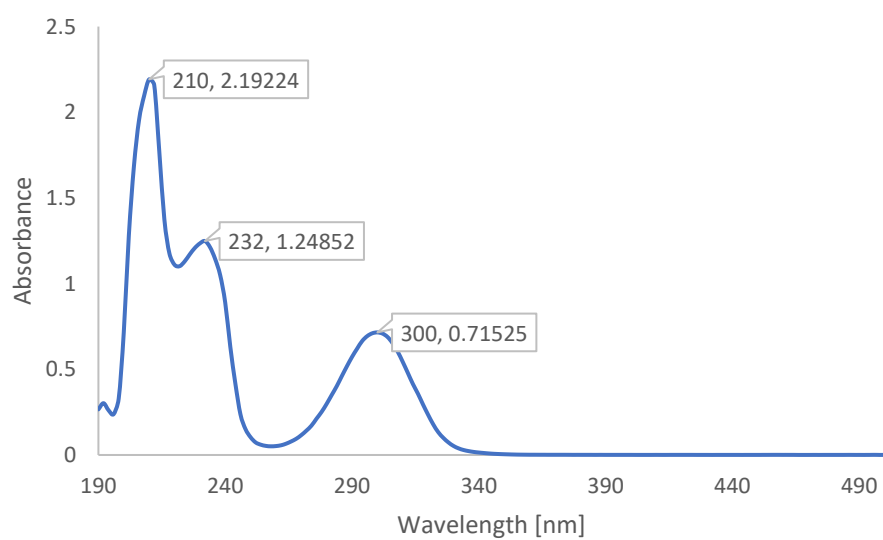

**Figure S31.** UV-Vis spectra of [ValOiPr][SA].



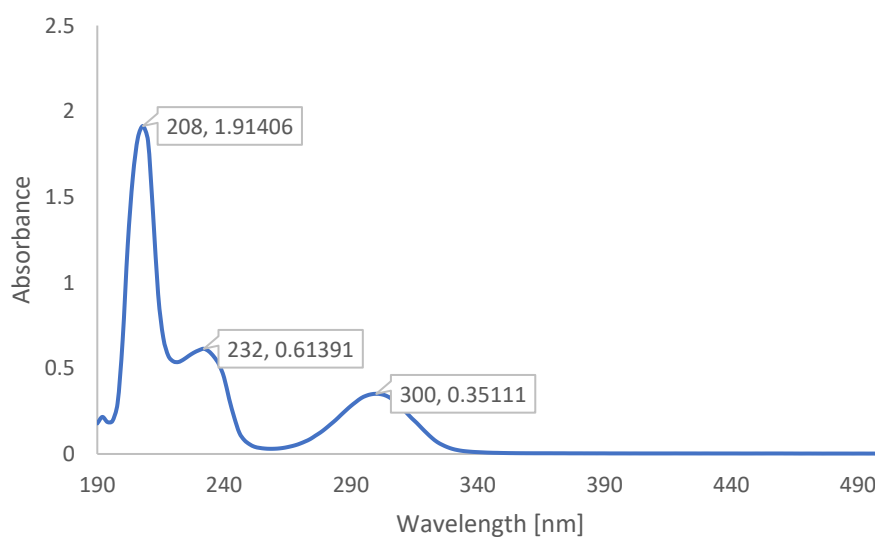

Figure S32. UV-Vis spectra of [ValOBu][SA].

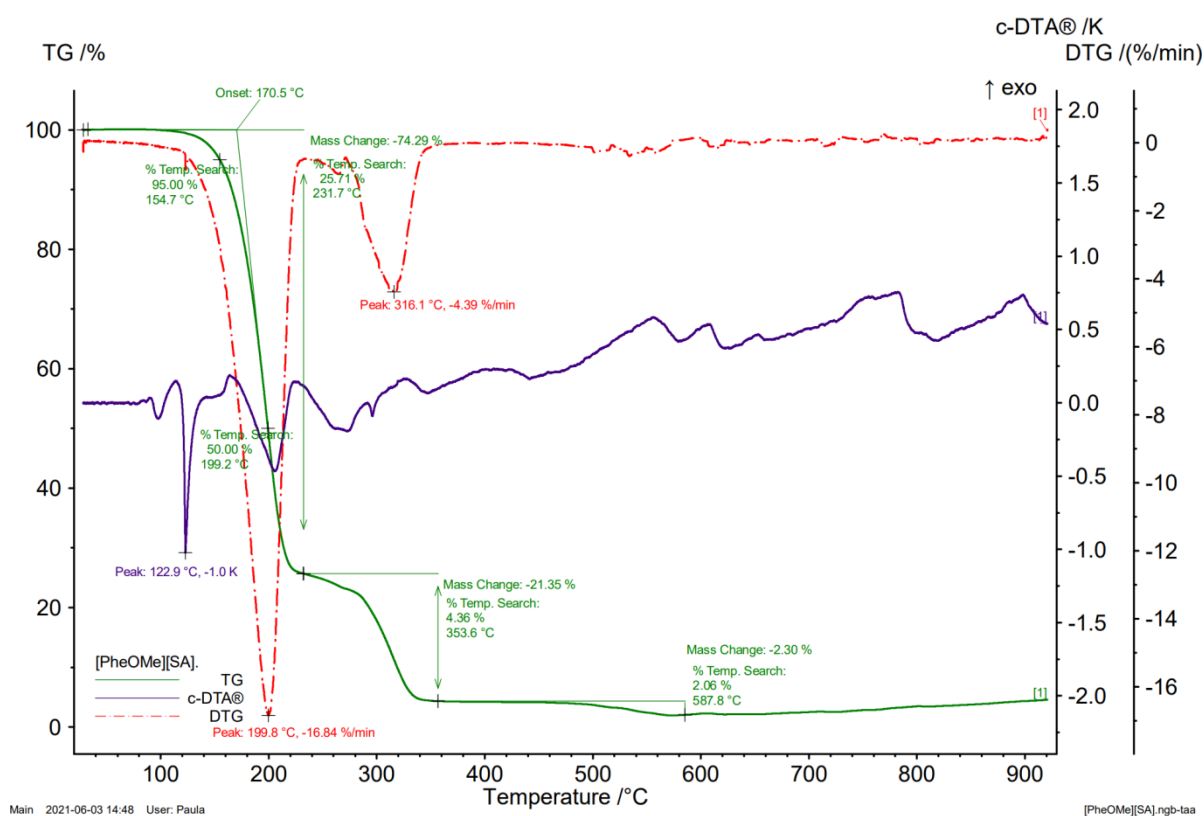

Figure S33. The TG, DTG, and c-DTA curves of [PheOMe][SA].

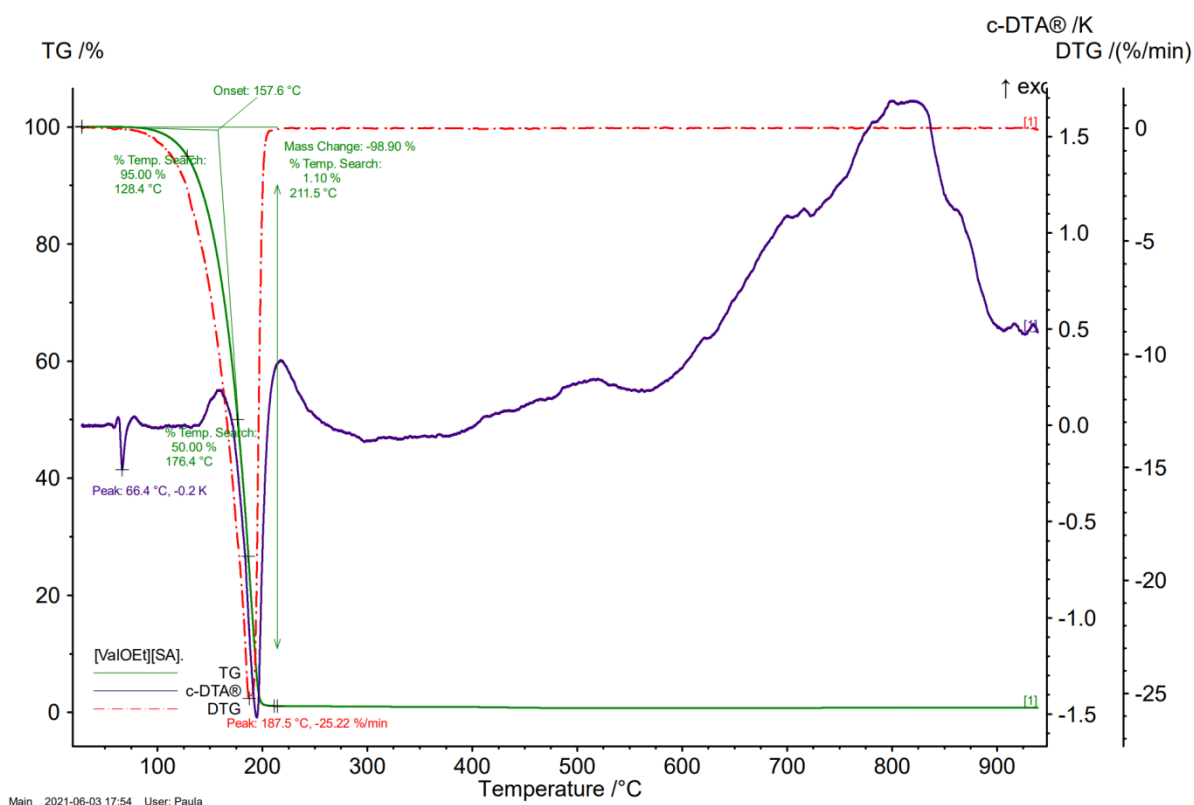

Figure S34. The TG, DTG, and c-DTA curves of [ValOEt][SA].

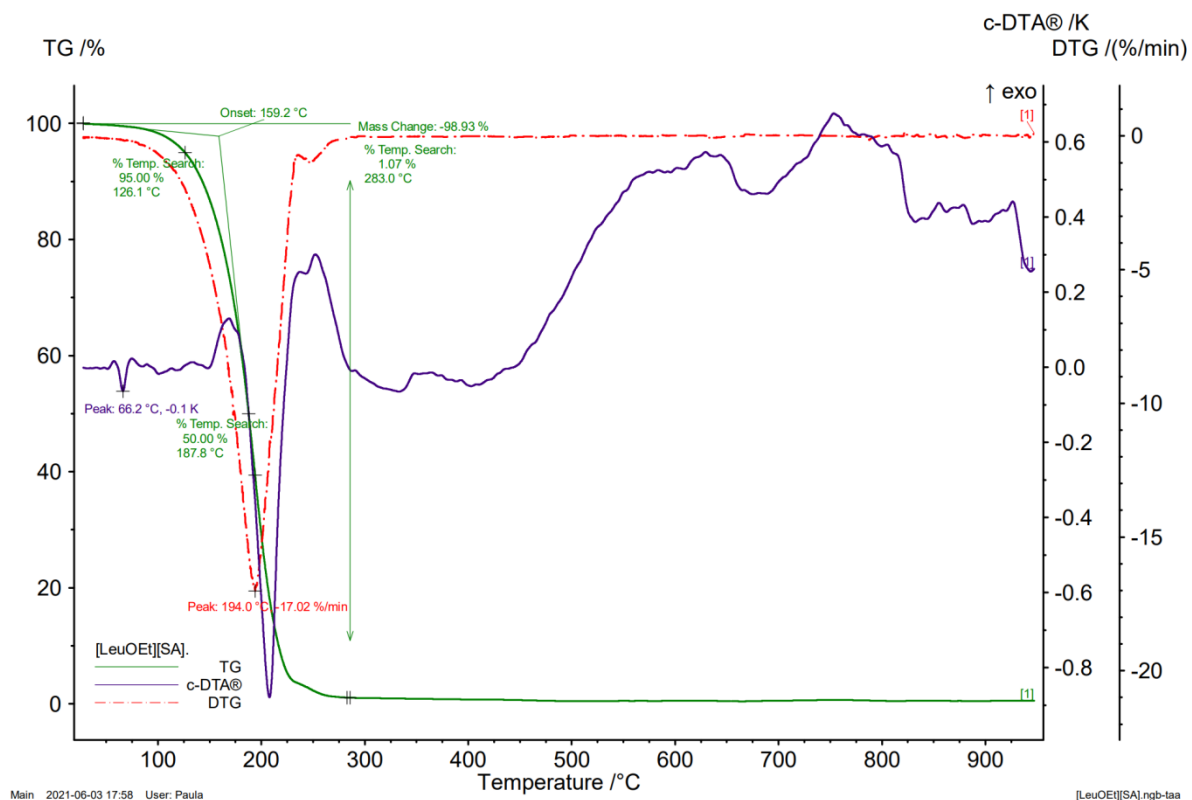

Figure S35. The TG, DTG, and c-DTA curves of [LeuOEt][SA].

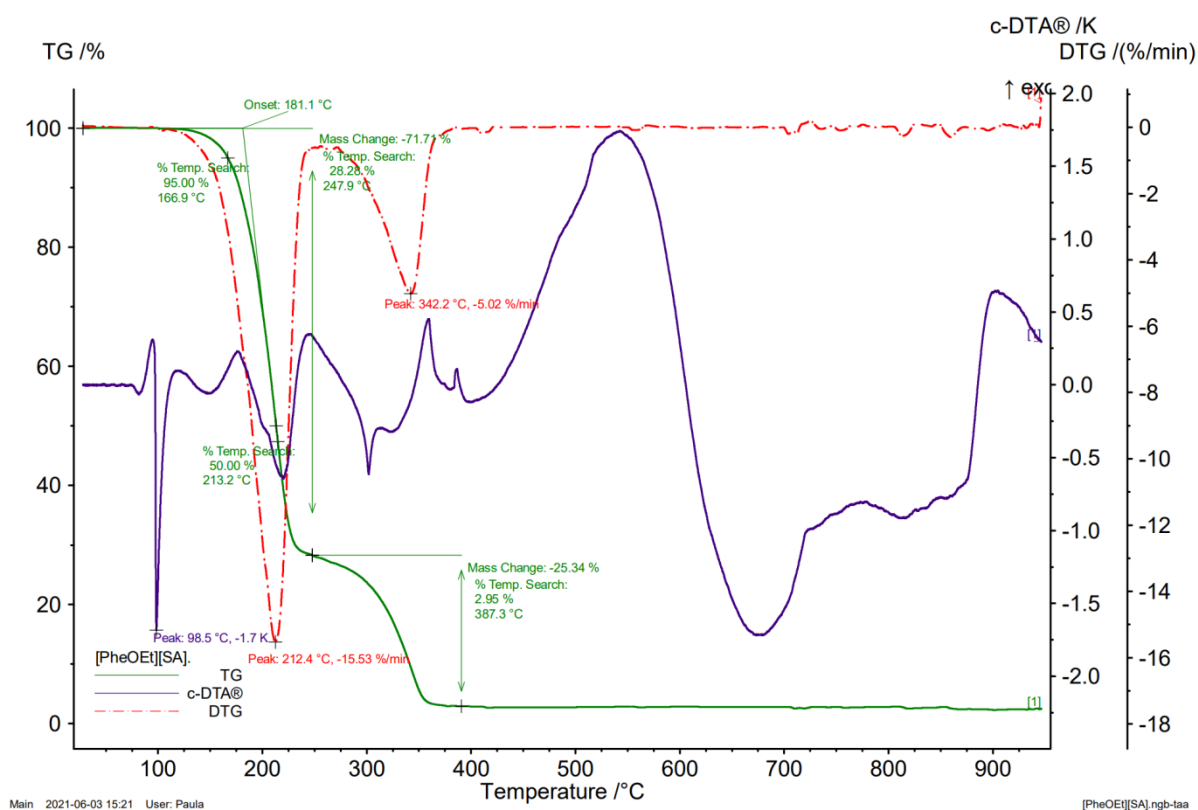

Figure S36. The TG, DTG, and c-DTA curves of [PheOEt][SA].

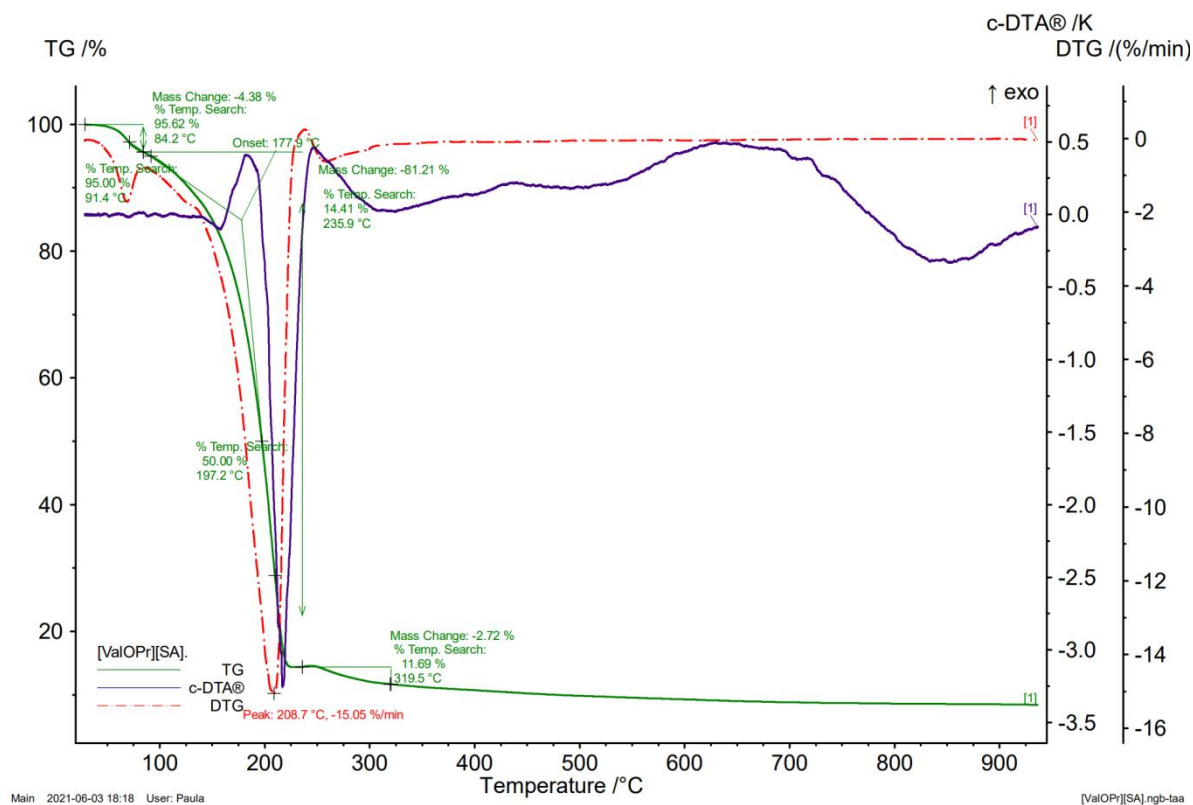

Figure S37. The TG, DTG, and c-DTA curves of [ValOPr][SA].

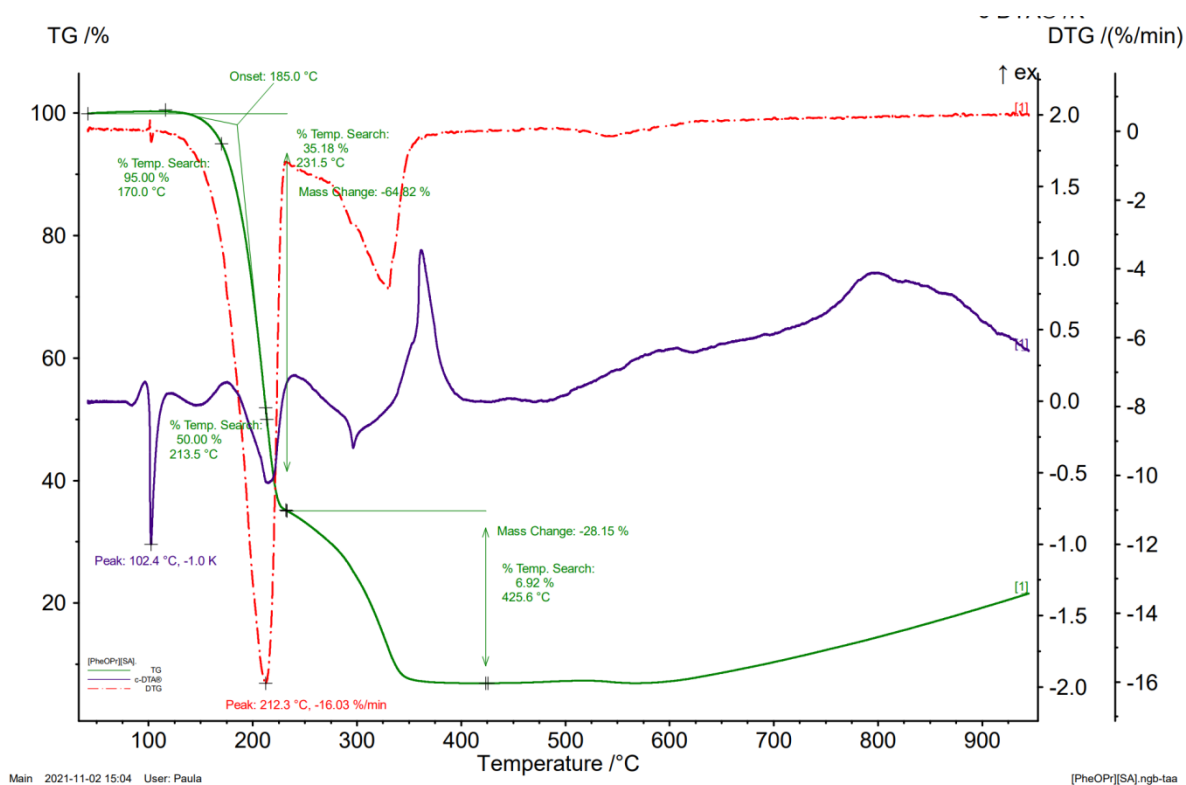

Figure S38. The TG, DTG, and c-DTA curves of [PheOPr][SA].

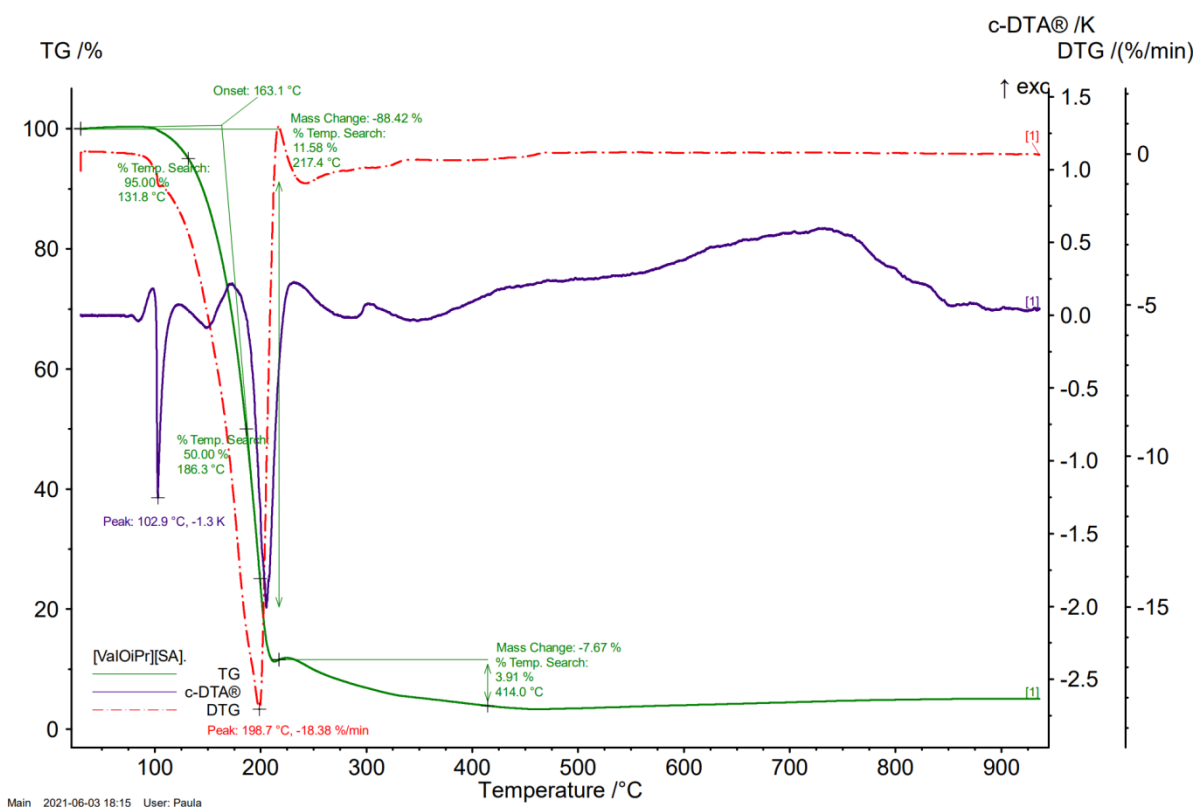

Figure S39. The TG, DTG, and c-DTA curves of [ValOiPr][SA].

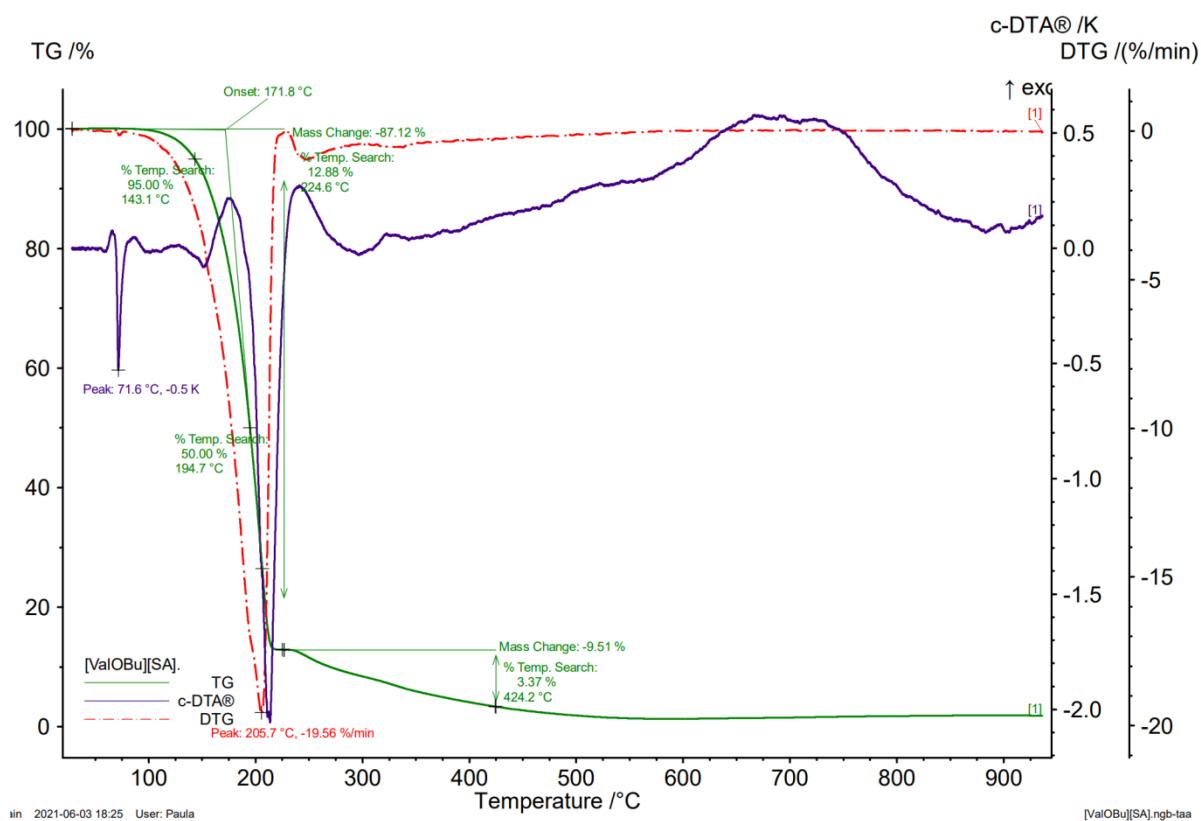

Figure S40. The TG, DTG, and c-DTA curves of [ValOBu][SA].

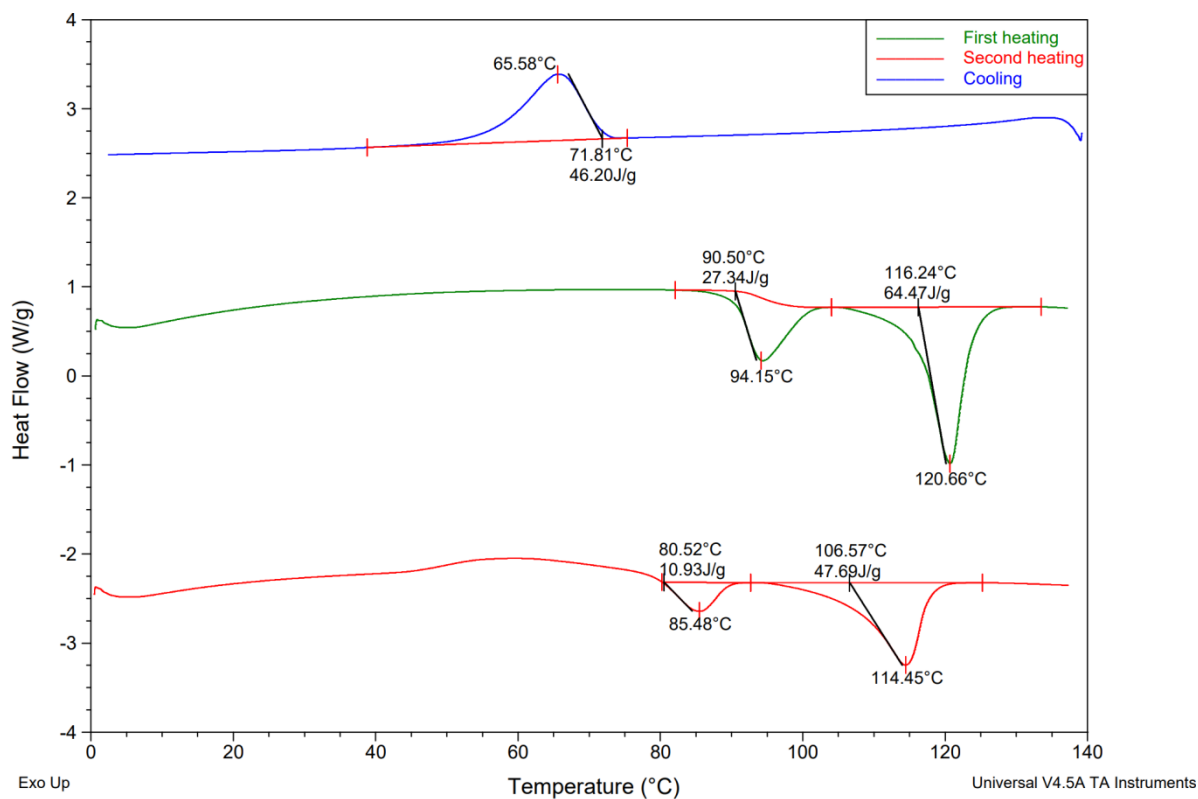

Figure S41. The DSC curves of [PheOMe][SA].

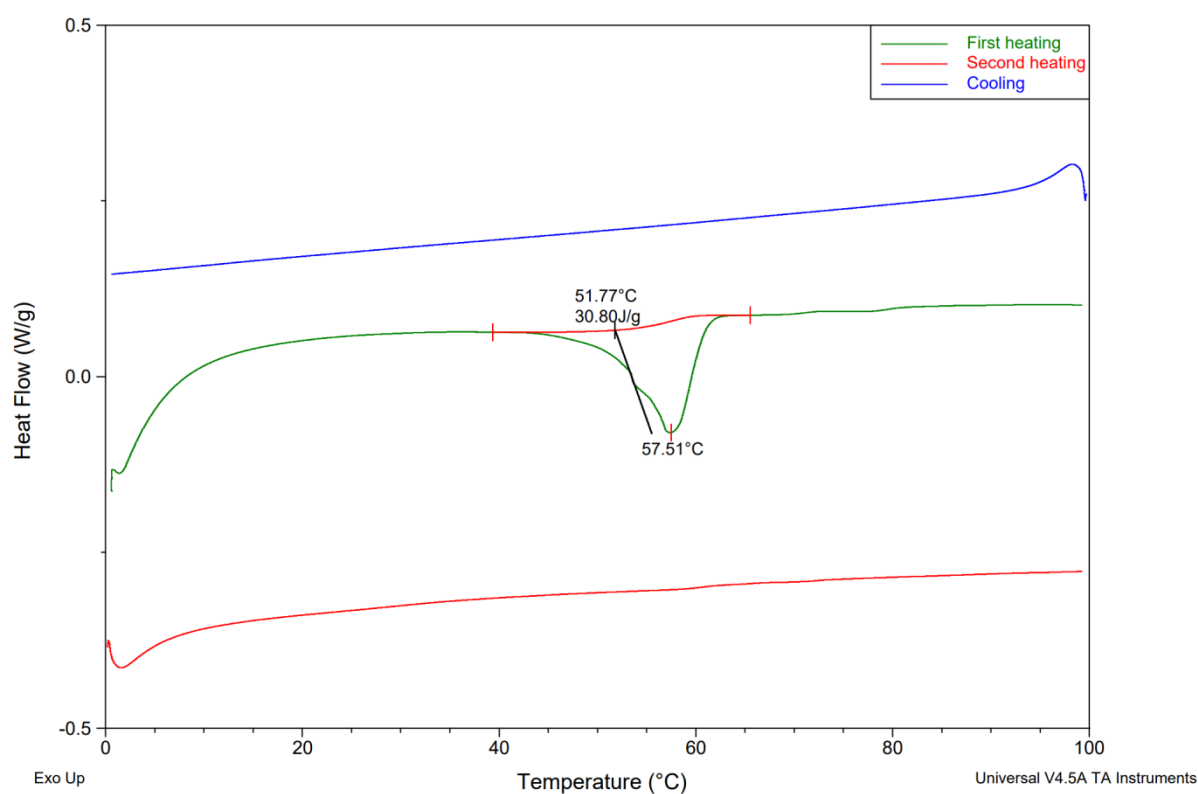

Figure S42. The DSC curves of [ValOEt][SA].

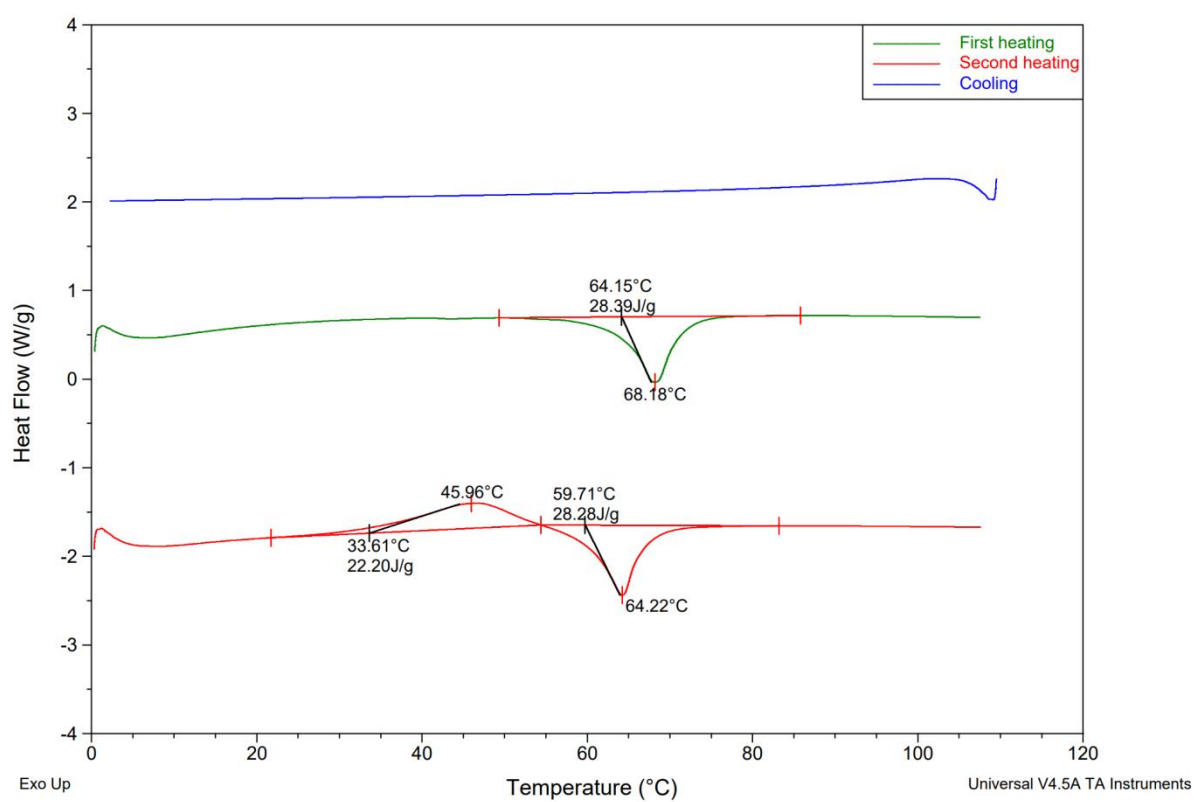

Figure S43. The DSC curves of [LeuOEt][SA].

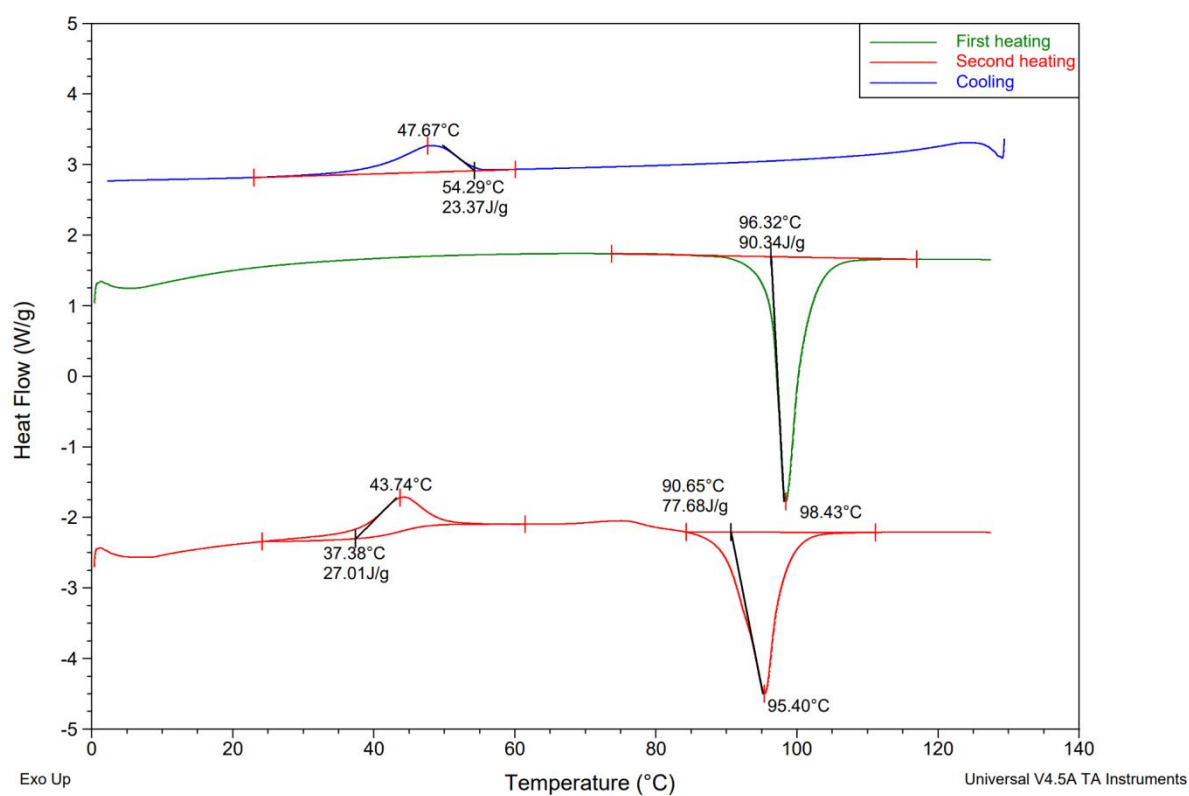

Figure S44. The DSC curves of [PheOEt][SA].

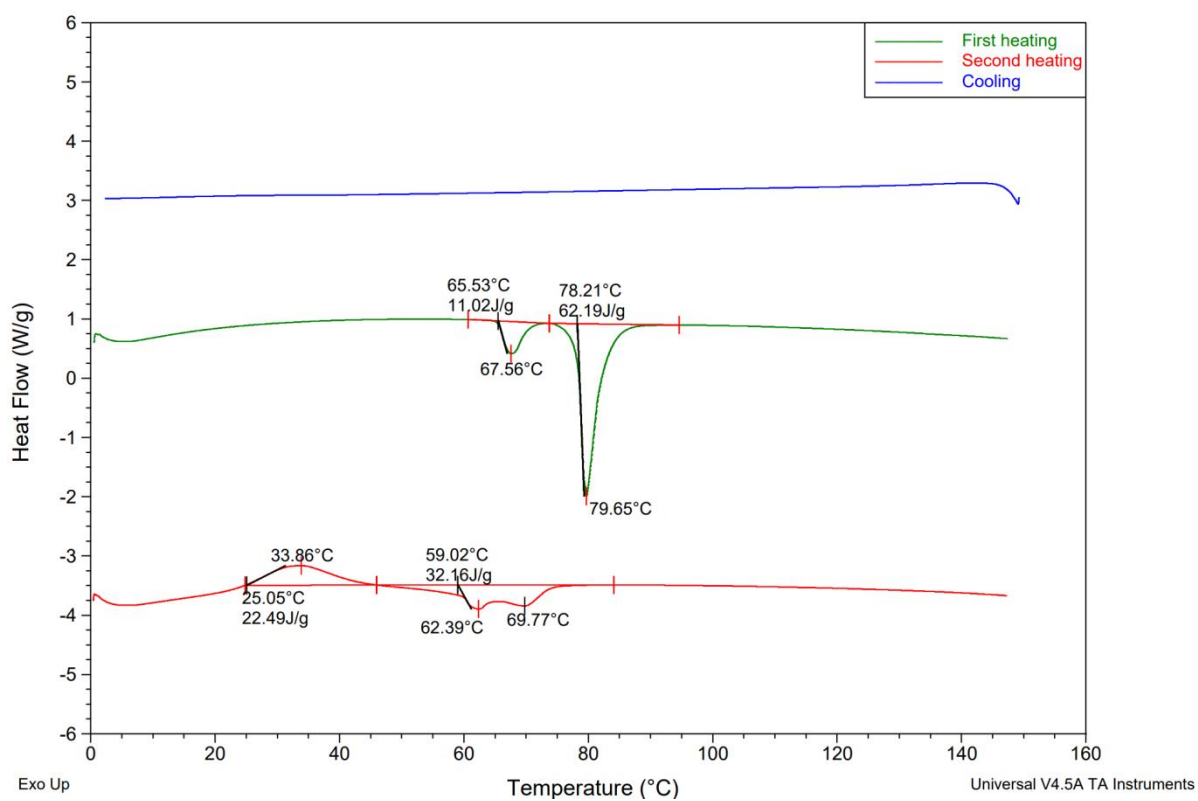

Figure S45. The DSC curves of [ValOPr][SA].

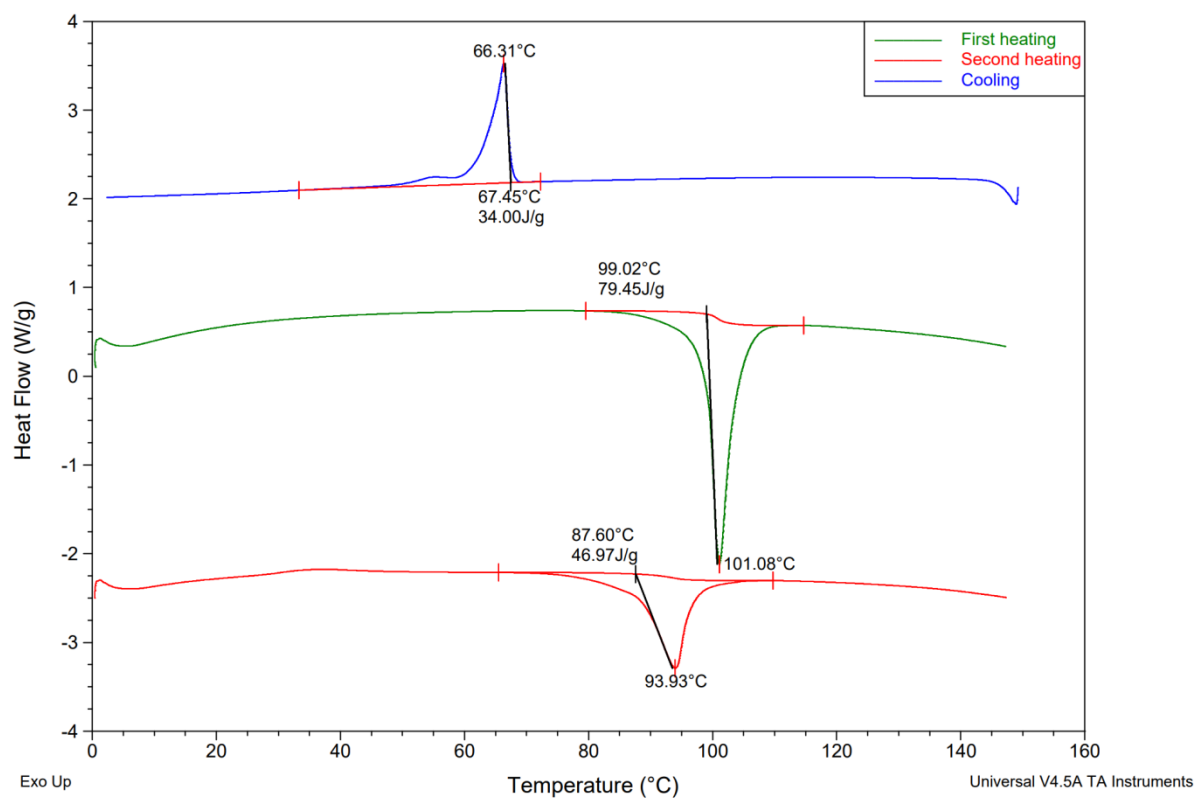

Figure S46. The DSC curves of [PheOPr][SA].

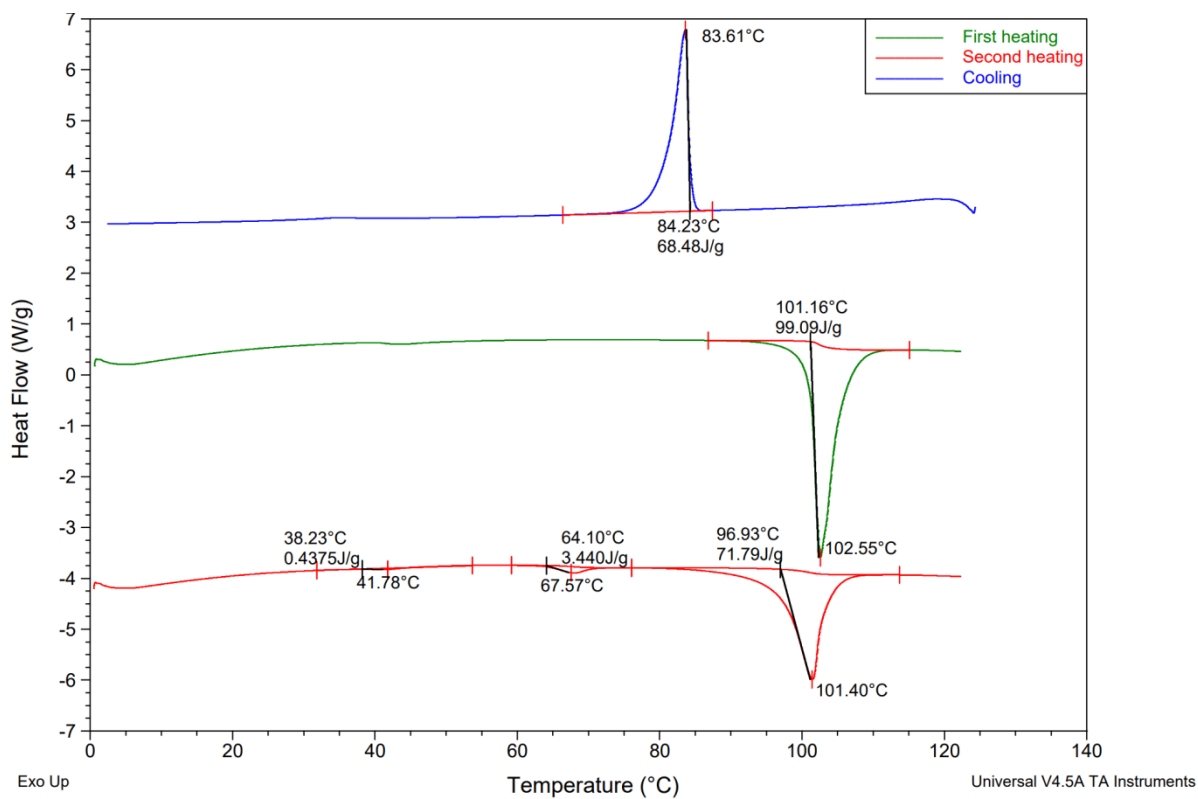

Figure S47. The DSC curves of [ValOiPr][SA].



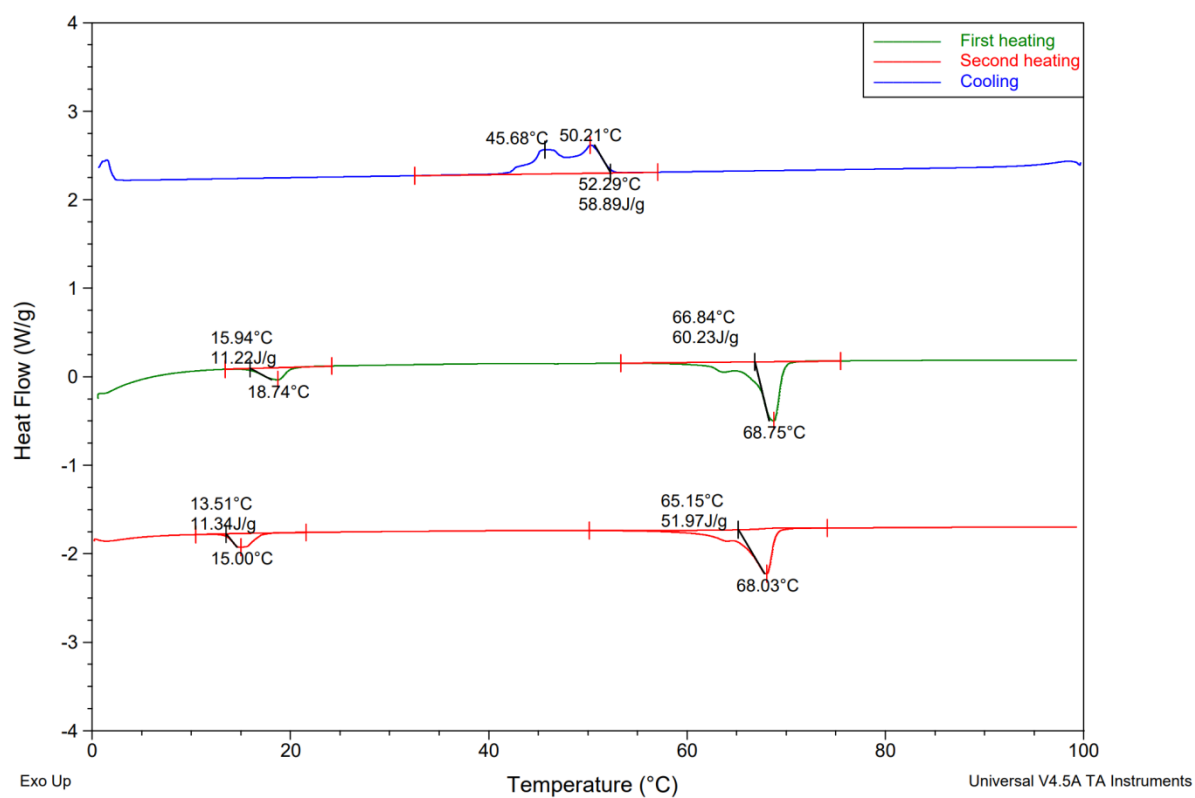

Figure S48. The DSC curves of [ValOBu][SA].

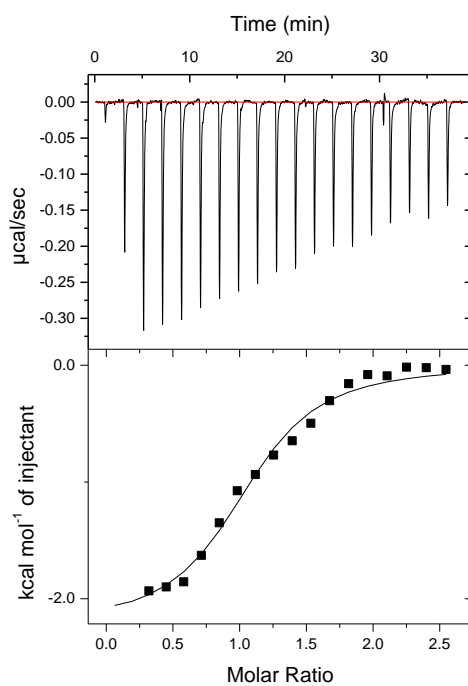

Figure S49. Raw data of titration of 350  $\mu\text{M}$  [LeuOEt][SA] with 27  $\mu\text{M}$  at 25 °C (upper panel). Integrated heat profile of calorimetric titration shown in upper panel (lower panel). The solid lines represent the best fit to a single binding site model.

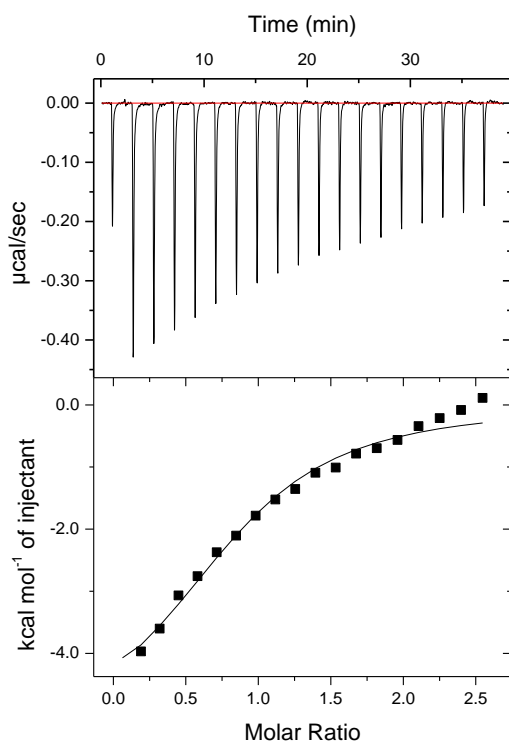

**Figure S50.** Raw data of titration of 500 µM [PheOPr][SA] with 27 µM at 25 °C (upper panel). Integrated heat profile of calorimetric titration shown in upper panel (lower panel). The solid lines represent the best fit to a single binding site model.

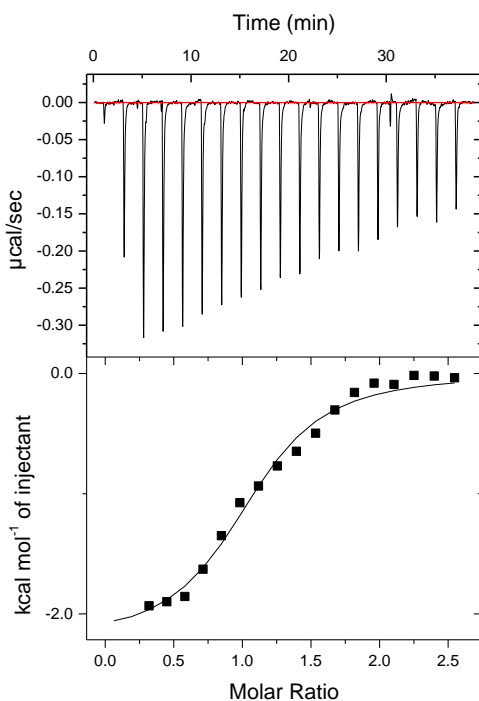

**Figure S51.** Raw data of titration of 500 µM [PheOPr][SA] with 27 µM at 25 °C (upper panel). Integrated heat profile of calorimetric titration shown in upper panel (lower panel). The solid lines represent the best fit to a single binding site model.

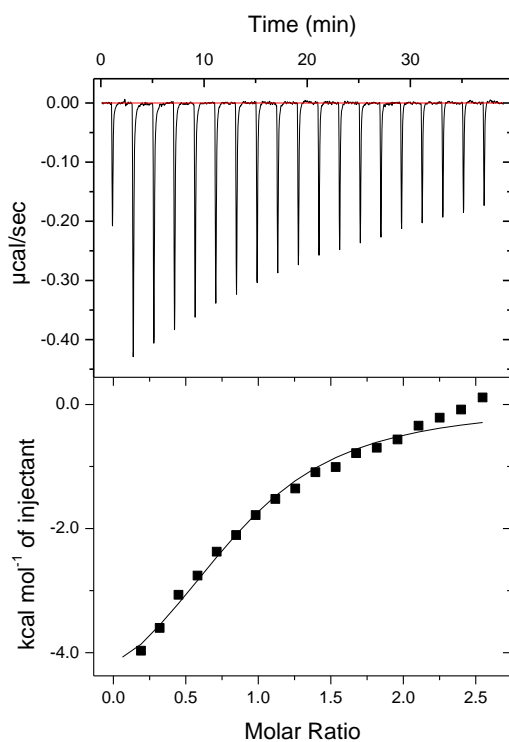

**Figure S52.** Raw data of titration of 350  $\mu\text{M}$  [ValOiPr][SA] with 27  $\mu\text{M}$  at 25  $^{\circ}\text{C}$  (upper panel). Integrated heat profile of calorimetric titration shown in upper panel (lower panel). The solid lines represent the best fit to a single binding site model.

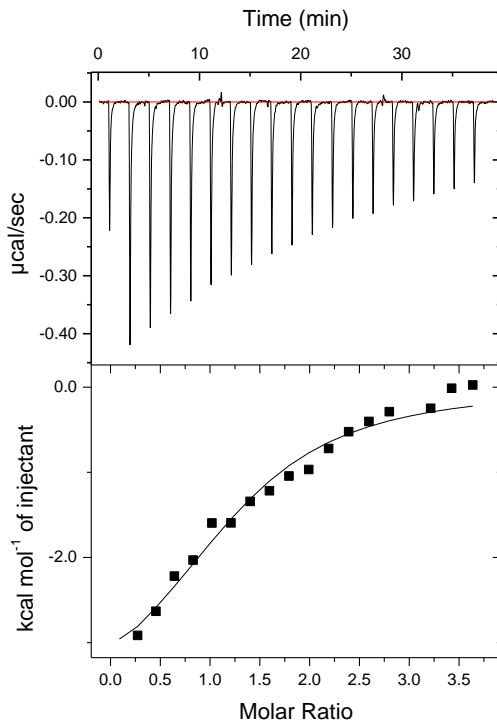

**Figure S53.** Raw data of titration of 500  $\mu\text{M}$  [ValOBu][SA] with 27  $\mu\text{M}$  at 25  $^{\circ}\text{C}$  (upper panel). Integrated heat profile of calorimetric titration shown in upper panel (lower panel). The solid lines represent the best fit to a single binding site model.

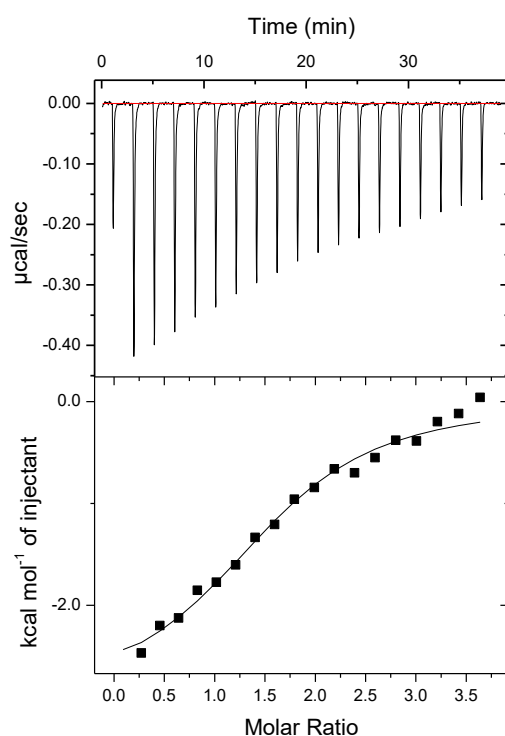

**Figure S54.** Raw data of titration of 500  $\mu\text{M}$  [ValOPr][SA] with 27  $\mu\text{M}$  at 25  $^{\circ}\text{C}$  (upper panel). Integrated heat profile of calorimetric titration shown in upper panel (lower panel). The solid lines represent the best fit to a single binding site model.

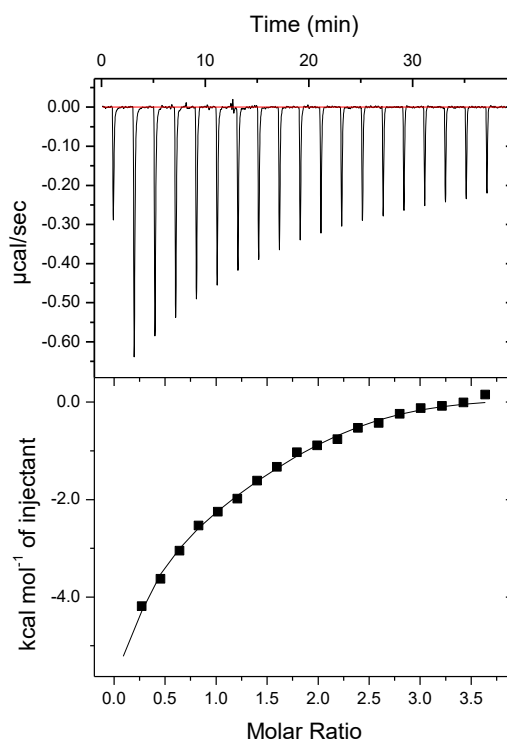

**Figure S55.** Raw data of titration of 500  $\mu\text{M}$  [ValOEt][SA] with 27  $\mu\text{M}$  at 25  $^{\circ}\text{C}$  (upper panel). Integrated heat profile of calorimetric titration shown in upper panel (lower panel). The solid lines represent the best fit to a single binding site model.

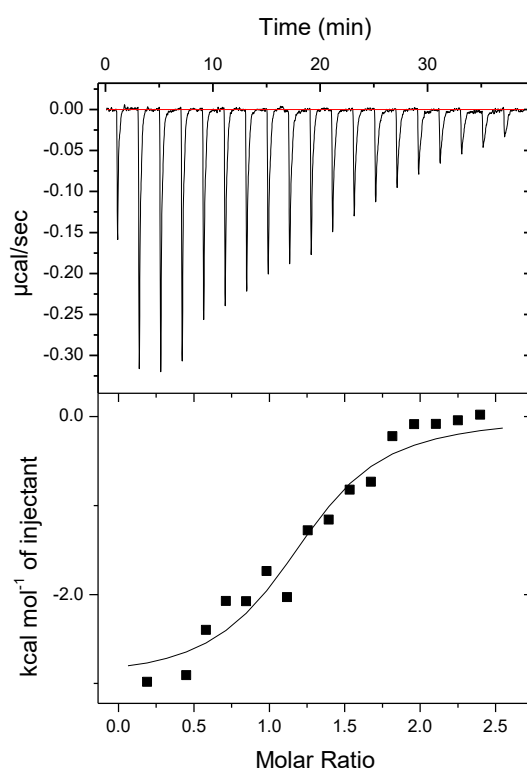

**Figure S56.** Raw data of titration of 500  $\mu\text{M}$  [PheOEt][SA] with 27  $\mu\text{M}$  at 25  $^{\circ}\text{C}$  (upper panel). Integrated heat profile of calorimetric titration shown in upper panel (lower panel). The solid lines represent the best fit to a single binding site model.

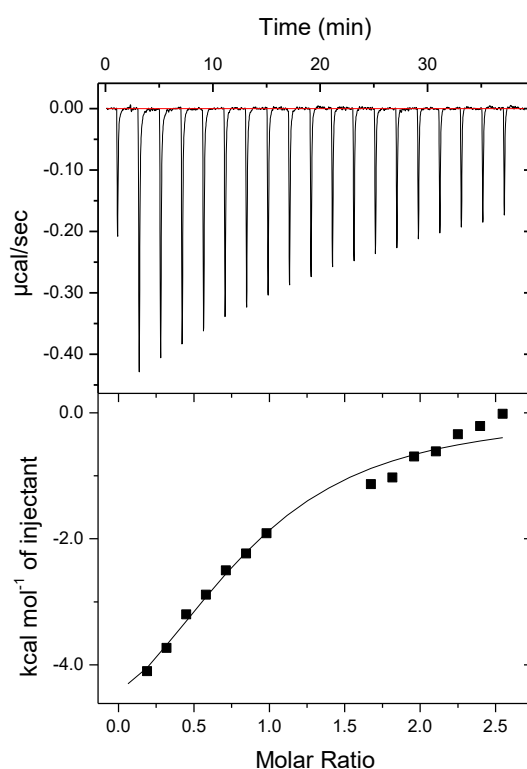

**Figure S57.** Raw data of titration of 500  $\mu\text{M}$  [PheOMe][SA] with 27  $\mu\text{M}$  at 25  $^{\circ}\text{C}$  (upper panel). Integrated heat profile of calorimetric titration shown in upper panel (lower panel). The solid lines represent the best fit to a single binding site model.
